# Supplementary material for: Exploration of mRNA-modifying METTL3 oncogene as momentous prognostic biomarker responsible for colorectal cancer development
Source: Open Med (Wars). 2025 Mar 26;20(1):20251167. doi: 10.1515/med-2025-1167 (PMC11964186; doi:10.1515/med-2025-1167)
Supplement: Supplementary Table [file med-2025-1167-sm.xlsx]

## Sheet: TCGA degs
Table S1: TCGA data
	logFC	AveExpr	t	P.Value	adj.P.Val	B
CDH3	5.20178	5.89338	20.4461	1.28223e-37	2.07055e-33	75.2157
ETV4	5.47132	6.35802	19.3168	1.23571e-35	9.97716e-32	70.6772
KRT80	6.31681	4.6052	17.9806	3.37254e-33	1.36149e-29	65.0957
ESM1	5.65118	2.61089	15.8286	4.54294e-29	1.04799e-25	55.5311
FOXQ1	6.80055	4.94397	14.8401	4.35182e-27	8.78414e-24	51.108
CLDN1	5.08004	6.27749	14.111	1.35751e-25	2.19211e-22	47.653
GRIN2D	5.44374	4.15835	13.8235	5.36133e-25	7.21456e-22	46.3515
DPEP1	8.18682	6.53425	13.547	2.02709e-24	2.3381e-21	44.9568
SLC6A6	3.30882	6.84491	13.001	2.86648e-23	2.89299e-20	42.3158
JUB	2.82584	4.387	12.9787	3.19697e-23	3.03674e-20	42.2778
KIAA1199	5.25852	6.46644	12.9297	4.06142e-23	3.45178e-20	41.9691
NFE2L3	2.9206	7.06701	12.8574	5.78388e-23	4.44753e-20	41.6166
LOC92659	2.85278	2.23135	12.4729	3.82389e-22	2.57284e-19	39.8462
LRRC8E	2.75179	3.70005	12.2636	1.07523e-21	6.43065e-19	38.8283
FUT1	2.62651	2.75957	12.1794	1.63185e-21	9.41111e-19	38.4375
ZSWIM4	1.88871	4.0763	11.8593	8.00531e-21	4.16999e-18	36.8111
TFAP4	1.68533	4.79769	11.7564	1.33672e-20	6.62218e-18	36.248
TEAD4	2.49725	4.54216	11.754	1.35331e-20	6.62218e-18	36.2537
SALL4	4.93324	1.12498	11.7422	1.43547e-20	6.81763e-18	36.2164
NEBL	2.1184	6.74518	11.5918	3.04217e-20	1.25597e-17	35.3722
CBX8	1.8936	3.56227	11.5884	3.09411e-20	1.25597e-17	35.5069
SPTBN2	3.12348	4.77785	11.5873	3.11114e-20	1.25597e-17	35.4088
MACC1	2.71699	6.18872	11.5058	4.67857e-20	1.84267e-17	34.9465
NKD2	4.49569	3.91808	11.4901	5.05894e-20	1.921e-17	34.9934
ACAN	4.25251	3.06444	11.4879	5.11536e-20	1.921e-17	35.034
WNT2	5.16917	2.45919	11.4082	7.62668e-20	2.6773e-17	34.6475
KIAA1549	2.35444	4.84417	11.3829	8.65735e-20	2.97444e-17	34.386
CGREF1	3.34628	4.54813	11.2793	1.4562e-19	4.70294e-17	33.8909
GYLTL1B	4.25378	4.64963	11.2445	1.73355e-19	5.48889e-17	33.7096
C10orf2	1.70676	5.0144	11.1709	2.50908e-19	7.36665e-17	33.316
PVT1	2.87842	2.60428	11.153	2.74561e-19	7.77828e-17	33.3859
MTHFD1L	2.32543	5.40628	11.1343	3.01647e-19	8.39827e-17	33.1115
GTF2IRD1	2.33339	6.068	11.1112	3.38825e-19	9.27347e-17	32.9761
TMEM206	1.63258	3.42177	11.0734	4.09761e-19	1.1028e-16	32.9576
CPNE7	5.47213	3.37501	11.043	4.77499e-19	1.24365e-16	32.8093
PYCR1	1.84916	6.92818	10.8879	1.0427e-18	2.40535e-16	31.8519
DNAJC2	1.51353	5.80926	10.8816	1.07667e-18	2.42506e-16	31.8304
PUS7	1.78237	5.15329	10.7247	2.37543e-18	4.98162e-16	31.071
MEX3A	2.9492	3.95626	10.5465	5.844e-18	1.13697e-15	30.2775
DKC1	1.55585	7.40583	10.4895	7.79426e-18	1.46351e-15	29.8523
MDFI	3.2233	3.1942	10.4625	8.93154e-18	1.65778e-15	29.9246
TRIB3	3.54661	5.88879	10.4321	1.04154e-17	1.86875e-15	29.5693
SULT2B1	4.09954	3.88171	10.4294	1.05588e-17	1.87366e-15	29.6982
SOX9	2.15864	7.86189	10.4269	1.06981e-17	1.87775e-15	29.5427
XRCC2	2.3836	2.39005	10.3171	1.86433e-17	3.01051e-15	29.2357
C6orf223	4.64587	4.48498	10.2672	2.39975e-17	3.79913e-15	28.8232
SOX4	2.07707	7.30075	10.2544	2.56042e-17	4.01414e-15	28.6676
CEP72	2.24116	2.87291	10.2138	3.14377e-17	4.78921e-15	28.702
VWA2	4.31335	3.91284	10.145	4.45463e-17	6.53939e-15	28.2675
TESC	4.1625	4.93521	10.1121	5.25997e-17	7.58375e-15	28.0052
SLC39A10	1.81618	5.15433	10.0957	5.71732e-17	8.09853e-15	27.9072
LOC100272146	1.89733	1.70481	10.0918	5.83039e-17	8.18688e-15	28.1206
TPX2	2.18677	7.17405	10.0627	6.75568e-17	9.40437e-15	27.7013
OSBPL3	2.04378	5.45625	10.0452	7.38108e-17	1.01008e-14	27.6365
NOP58	1.33046	6.80323	10.032	7.89218e-17	1.07095e-14	27.5452
SLCO4A1	3.4223	5.61541	10.0027	9.15671e-17	1.23219e-14	27.4153
CBX2	3.71489	3.56496	9.97184	1.0704e-16	1.41679e-14	27.4351
GALNT6	2.30297	6.20101	9.94611	1.21944e-16	1.58802e-14	27.1156
TGFBI	3.14866	9.45297	9.8268	2.2316e-16	2.75084e-14	26.5451
LMTK3	3.52009	2.14785	9.81049	2.42375e-16	2.96505e-14	26.7189
MKI67IP	1.16584	6.00084	9.80548	2.48602e-16	3.01837e-14	26.4106
ENC1	1.86936	7.28403	9.80089	2.5445e-16	3.04359e-14	26.383
SHROOM4	2.24025	4.88393	9.76081	3.11725e-16	3.67426e-14	26.2408
NOP2	1.65654	6.00304	9.73569	3.54014e-16	4.05434e-14	26.0591
ANLN	2.10063	5.85546	9.72159	3.80235e-16	4.32397e-14	25.9915
GPR56	1.66014	8.05018	9.71836	3.86502e-16	4.3645e-14	25.9773
WDR75	1.17513	5.70533	9.62897	6.07793e-16	6.63151e-14	25.5299
LRP8	2.8766	3.7516	9.62679	6.14536e-16	6.66009e-14	25.6844
CELSR3	3.02291	4.10748	9.58862	7.4559e-16	7.81805e-14	25.452
POLR1B	1.24986	5.49786	9.5867	7.52863e-16	7.84338e-14	25.3256
PDX1	4.55112	3.47712	9.5756	7.96385e-16	8.1911e-14	25.458
KAT2A	1.62012	6.34949	9.54922	9.10228e-16	9.30276e-14	25.115
C7orf68	2.32448	4.80596	9.5407	9.50312e-16	9.65135e-14	25.1402
CARD14	3.40067	1.46053	9.51341	1.09115e-15	1.08765e-13	25.2511
TCF7	2.22446	5.87013	9.4885	1.23778e-15	1.22623e-13	24.8178
MMP7	6.3833	4.02913	9.48229	1.27728e-15	1.25765e-13	24.9273
EPHX4	4.02038	2.39407	9.45609	1.45842e-15	1.41021e-13	24.9456
VSNL1	3.54874	4.38884	9.43594	1.61506e-15	1.51628e-13	24.6541
XPO5	1.51556	6.43935	9.41293	1.81449e-15	1.65539e-13	24.4286
CST1	7.35139	3.3771	9.40652	1.87431e-15	1.70036e-13	24.6221
NAT10	1.35855	6.70943	9.37926	2.15147e-15	1.9301e-13	24.2582
FABP6	6.41081	1.45382	9.36127	2.35657e-15	2.07945e-13	24.4977
DDX31	1.29338	4.24137	9.33424	2.70188e-15	2.3457e-13	24.16
GABRD	2.86425	0.165636	9.33273	2.72248e-15	2.35094e-13	24.3352
ATP11A	2.37543	6.36665	9.32725	2.79913e-15	2.40427e-13	23.9983
RBM28	1.42653	4.78407	9.30048	3.20492e-15	2.72385e-13	23.9352
ACTR3B	1.45394	3.62748	9.29431	3.30653e-15	2.79549e-13	24.0327
TTLL4	1.3593	5.05673	9.28372	3.48844e-15	2.91872e-13	23.8287
TOMM34	2.07324	6.65519	9.26014	3.93022e-15	3.23802e-13	23.6595
RAE1	1.50881	6.06312	9.24543	4.23359e-15	3.47025e-13	23.5913
PPAT	1.55592	4.78446	9.23911	4.37118e-15	3.56494e-13	23.6271
KIAA0406	1.41407	5.61947	9.16759	6.27444e-15	4.94242e-13	23.2136
CCT6A	1.20169	8.28656	9.15639	6.63993e-15	5.20493e-13	23.1551
TH1L	1.66668	7.20579	9.14773	6.93684e-15	5.38539e-13	23.0966
ASCL2	3.67863	6.16883	9.07873	9.8294e-15	7.24773e-13	22.7527
GRAMD1A	1.49013	6.10764	9.07043	1.02501e-14	7.48955e-13	22.7121
PLEKHG4	2.36829	4.88429	9.0596	1.0826e-14	7.83941e-13	22.7182
SKA3	2.31248	4.71661	8.99761	1.4803e-14	1.04842e-12	22.4229
SLC7A5	2.82259	7.17926	8.97978	1.61968e-14	1.13223e-12	22.2542
ORC6L	2.08894	3.75681	8.94102	1.9694e-14	1.31925e-12	22.2512
PABPC1L	3.70932	3.73532	8.94024	1.97708e-14	1.31925e-12	22.2501
MTBP	1.81354	2.90461	8.93681	2.0116e-14	1.33676e-12	22.3257
CAD	1.59037	6.56965	8.92659	2.11796e-14	1.39595e-12	21.9866
C20orf20	1.70248	5.39697	8.90821	2.32367e-14	1.52531e-12	21.9241
APLN	3.28664	2.85406	8.90465	2.36573e-14	1.5413e-12	22.1704
RUNX1	1.74485	6.29687	8.90453	2.36712e-14	1.5413e-12	21.8782
GRHL3	4.83933	1.33834	8.86114	2.94574e-14	1.88761e-12	22.0284
STRA6	5.36285	2.28503	8.8469	3.16483e-14	1.97412e-12	21.9254
MET	1.68039	7.35048	8.84681	3.16631e-14	1.97412e-12	21.5901
ANKZF1	1.33834	5.34819	8.80882	3.83405e-14	2.31881e-12	21.4299
MORC2	1.0745	5.61055	8.80017	4.00471e-14	2.41299e-12	21.3736
ZC3H8	1.36533	3.48987	8.79782	4.05243e-14	2.43266e-12	21.5709
AMPD2	1.19869	5.82937	8.79072	4.19986e-14	2.51183e-12	21.3183
SIM2	3.89425	3.23294	8.78994	4.21646e-14	2.51245e-12	21.562
UTP14A	1.58718	5.74321	8.77457	4.5556e-14	2.67505e-12	21.2404
URB2	1.36001	4.68991	8.76004	4.90118e-14	2.85952e-12	21.2382
PPM1H	2.09787	5.44424	8.75772	4.95866e-14	2.87934e-12	21.1694
CSE1L	1.61532	7.74022	8.75708	4.97483e-14	2.87934e-12	21.1467
CCNO	3.5736	1.89339	8.75481	5.03192e-14	2.90198e-12	21.4893
MIR17HG	2.9573	2.26141	8.74444	5.30148e-14	3.02503e-12	21.4198
ATG9B	3.61107	1.70105	8.7341	5.5846e-14	3.16422e-12	21.3941
TRIP13	1.89661	4.55727	8.71952	6.00959e-14	3.3348e-12	21.0497
RHBDF2	1.7246	5.29296	8.7071	6.39685e-14	3.52547e-12	20.9254
ATIC	1.15757	7.26446	8.7055	6.44851e-14	3.53578e-12	20.8832
PALB2	1.00273	4.40164	8.69877	6.67047e-14	3.63901e-12	20.9635
TTC26	1.70735	2.33	8.68928	6.99648e-14	3.80401e-12	21.1431
TTYH3	1.71126	7.42208	8.68435	7.17222e-14	3.87348e-12	20.7793
C19orf28	1.60674	5.7856	8.64427	8.77283e-14	4.62953e-12	20.5887
KLHL35	2.9441	0.985883	8.64003	8.96159e-14	4.71374e-12	20.9456
HSPH1	2.14793	7.98872	8.63838	9.03624e-14	4.73757e-12	20.5583
POU5F1B	4.23436	2.38427	8.63153	9.35291e-14	4.88576e-12	20.8542
SLC5A6	2.04072	6.73781	8.62381	9.72257e-14	5.03205e-12	20.4734
COL7A1	4.30896	3.99931	8.62261	9.78131e-14	5.03778e-12	20.634
QSOX2	1.44104	5.08014	8.62231	9.79604e-14	5.03778e-12	20.5174
LOC100190940	6.50005	2.53276	8.61475	1.01751e-13	5.2161e-12	20.7606
SSB	1.06854	7.24951	8.60611	1.06264e-13	5.41308e-12	20.3874
TARBP1	1.40315	5.46106	8.5947	1.12532e-13	5.71436e-12	20.3555
MSL3L2	1.60237	3.11218	8.59352	1.13203e-13	5.73041e-12	20.6009
CBX4	1.6565	5.1639	8.5687	1.2822e-13	6.45014e-12	20.2443
POP1	1.65761	3.89737	8.55434	1.37805e-13	6.8894e-12	20.3082
RNF43	2.37701	7.98068	8.5439	1.45214e-13	7.21717e-12	20.0875
LOC388796	2.25238	5.22968	8.54178	1.46769e-13	7.24778e-12	20.1057
TLX1	4.11065	0.405654	8.52275	1.61467e-13	7.90112e-12	20.3728
CD3EAP	1.44201	4.81456	8.51844	1.64996e-13	8.00109e-12	20.023
NOB1	1.16461	6.56782	8.50702	1.7472e-13	8.44725e-12	19.8922
DBNDD1	2.37069	4.28828	8.50242	1.78797e-13	8.56741e-12	20.0003
PLEKHN1	3.44436	1.11991	8.49101	1.89325e-13	9.04502e-12	20.2141
C16orf88	1.06617	4.73338	8.48834	1.91879e-13	9.1131e-12	19.8811
PLXNA1	1.42024	6.35766	8.45743	2.24025e-13	1.05041e-11	19.647
PUS1	1.45093	5.24084	8.45153	2.30742e-13	1.07378e-11	19.6564
RUVBL1	1.26895	6.1702	8.45027	2.32201e-13	1.07746e-11	19.6139
PRR7	2.56646	1.94004	8.4459	2.37337e-13	1.09189e-11	19.9663
CCDC86	1.44622	5.58133	8.44253	2.41384e-13	1.10735e-11	19.5927
TMEM132A	2.1711	4.92408	8.42397	2.64901e-13	1.19821e-11	19.5439
CNTD2	4.02818	0.418221	8.42235	2.67049e-13	1.20455e-11	19.8836
INHBA	4.2642	2.66973	8.40497	2.91325e-13	1.31039e-11	19.7142
PPRC1	1.20661	6.04862	8.39239	3.10264e-13	1.39171e-11	19.3286
DSN1	1.40183	5.25064	8.38713	3.18536e-13	1.41463e-11	19.3361
LOC541471	1.99602	3.03377	8.37592	3.3692e-13	1.47842e-11	19.5343
MMP11	4.04382	6.38307	8.37303	3.41816e-13	1.48592e-11	19.2277
NCL	1.07301	9.91865	8.37275	3.4231e-13	1.48592e-11	19.2703
C1orf107	1.02522	5.32023	8.3717	3.44111e-13	1.48875e-11	19.2552
ZDHHC9	1.53757	7.27867	8.36598	3.54087e-13	1.52474e-11	19.1937
UBE2C	2.15553	6.33371	8.36085	3.63296e-13	1.5561e-11	19.1678
COL11A1	5.97669	3.62242	8.3555	3.73141e-13	1.59404e-11	19.3603
SCD	2.43262	8.89161	8.33569	4.11996e-13	1.72803e-11	19.0691
BYSL	1.56283	5.05778	8.32641	4.31572e-13	1.80545e-11	19.0491
RRP12	1.57601	5.93886	8.31604	4.54523e-13	1.8868e-11	18.9526
NOL8	1.05922	5.60943	8.30756	4.74192e-13	1.95338e-11	18.922
HSP90AB1	1.22313	10.7437	8.29436	5.06512e-13	2.07593e-11	18.8969
C11orf84	1.40319	4.61738	8.28396	5.3352e-13	2.17558e-11	18.8802
GRINA	1.6044	7.73683	8.25903	6.04251e-13	2.43237e-11	18.6697
DCAF13	1.32816	6.25096	8.25861	6.05531e-13	2.43237e-11	18.6622
TOP1MT	1.98056	6.09399	8.24427	6.50439e-13	2.58702e-11	18.5938
DDN	3.66594	1.11524	8.23811	6.70753e-13	2.64179e-11	18.9796
C17orf96	3.1522	3.4079	8.22226	7.25927e-13	2.83832e-11	18.7317
NKRF	1.48532	4.68074	8.20156	8.04909e-13	3.09799e-11	18.4662
GARS	1.24338	7.45538	8.20134	8.05768e-13	3.09799e-11	18.3805
RIPK2	1.26167	4.71599	8.19578	8.28438e-13	3.17705e-11	18.434
KIF18B	1.92236	4.22031	8.19444	8.33982e-13	3.18372e-11	18.4847
METTL1	1.37294	4.42952	8.18633	8.6838e-13	3.30722e-11	18.419
HJURP	1.77629	4.64642	8.17463	9.205e-13	3.48108e-11	18.3371
PAQR4	1.91297	5.74202	8.17386	9.24057e-13	3.48388e-11	18.2554
SMOX	2.06374	4.41957	8.17117	9.36533e-13	3.50885e-11	18.3454
ATAD2	1.58121	5.87441	8.16722	9.55163e-13	3.57036e-11	18.2182
YTHDF1	1.21942	6.78683	8.16256	9.77572e-13	3.64569e-11	18.1844
DDX56	1.16088	6.56359	8.15159	1.03246e-12	3.83552e-11	18.1306
MOGS	0.927239	6.55948	8.15117	1.03462e-12	3.83552e-11	18.1286
WDR43	1.13731	6.36685	8.15098	1.0356e-12	3.83552e-11	18.129
TMEM41A	1.22522	5.43263	8.1488	1.04691e-12	3.86782e-11	18.1459
ANKRD13B	2.14253	3.66504	8.14701	1.0563e-12	3.86915e-11	18.3267
TNFRSF12A	2.18091	5.45921	8.14501	1.06685e-12	3.88884e-11	18.1258
SMYD5	1.15722	5.45084	8.14201	1.08294e-12	3.93857e-11	18.1114
CASP2	1.05502	6.05745	8.13934	1.09742e-12	3.98176e-11	18.076
SLC7A6	1.20577	6.25293	8.13892	1.09974e-12	3.98176e-11	18.0707
LRP11	1.42332	6.40469	8.12514	1.17785e-12	4.22664e-11	18.0011
DDX55	1.18111	4.80824	8.12217	1.19536e-12	4.27998e-11	18.062
TEX10	1.09226	5.0244	8.09677	1.35641e-12	4.77197e-11	17.9174
RHEBL1	2.24276	0.659398	8.08398	1.44553e-12	5.01989e-11	18.2393
CYP27B1	1.93848	1.54749	8.07316	1.52543e-12	5.25216e-11	18.1629
CBFB	1.25545	6.17693	8.06303	1.60418e-12	5.48821e-11	17.6977
SLC12A8	1.22946	4.4531	8.0568	1.65462e-12	5.63738e-11	17.7784
SF3B3	1.05819	7.91315	8.05678	1.65477e-12	5.63738e-11	17.6742
DDX27	1.59279	7.07369	8.05569	1.66383e-12	5.65631e-11	17.6582
ZNF473	1.13973	3.89934	8.0487	1.72264e-12	5.8195e-11	17.8109
LIMK1	1.23426	5.57935	8.03951	1.80312e-12	6.07367e-11	17.5998
KRT23	7.33435	4.66073	8.03767	1.81963e-12	6.1087e-11	17.661
HNF1A	1.30225	5.33247	8.03726	1.82338e-12	6.1087e-11	17.6022
BOP1	1.93667	4.99042	8.03361	1.8567e-12	6.18186e-11	17.6095
OXTR	2.57665	1.00128	8.02802	1.90896e-12	6.32974e-11	17.9621
GTPBP4	1.12585	6.24023	8.02349	1.95242e-12	6.44737e-11	17.5021
FAM89A	1.60985	3.31801	8.01378	2.04888e-12	6.71101e-11	17.7201
NOL6	1.16345	6.25955	7.9973	2.2235e-12	7.26824e-11	17.3731
DIAPH3	1.79711	4.14498	7.99342	2.26678e-12	7.39473e-11	17.5059
KIF14	1.98262	3.53482	7.99187	2.28428e-12	7.4368e-11	17.5834
RTKN	1.33536	6.16773	7.97969	2.42651e-12	7.85238e-11	17.2879
ADAT2	1.66683	3.92729	7.95621	2.72626e-12	8.75401e-11	17.3535
CCAR1	0.831366	6.30041	7.9508	2.80036e-12	8.95451e-11	17.1441
PITX2	4.58997	2.78208	7.9452	2.8792e-12	9.15221e-11	17.4495
TMEM63A	1.58219	7.57457	7.93369	3.04813e-12	9.60301e-11	17.0638
VEGFA	1.82287	7.29215	7.93356	3.05012e-12	9.60301e-11	17.0597
C2orf15	1.49019	2.4536	7.92955	3.1114e-12	9.737e-11	17.4055
DHX34	1.52426	5.13253	7.92794	3.13622e-12	9.79568e-11	17.0791
IQGAP3	2.06194	5.78307	7.92605	3.16574e-12	9.8688e-11	17.0341
C2	2.36649	6.80011	7.92207	3.22873e-12	1.00072e-10	17.0006
TGIF2	1.81943	5.43063	7.91111	3.40901e-12	1.04457e-10	16.9768
LOC389791	3.3299	-0.551222	7.90433	3.52531e-12	1.07612e-10	17.3747
HSPD1	1.4722	9.61965	7.89861	3.62652e-12	1.10493e-10	16.9271
GNL3	1.15422	6.98157	7.89457	3.69986e-12	1.12515e-10	16.8662
GPT2	1.97549	6.06228	7.8899	3.78639e-12	1.14714e-10	16.8491
UBAP2L	0.811862	7.28017	7.86827	4.21413e-12	1.26722e-10	16.7394
DARS	1.00445	6.97526	7.86781	4.22368e-12	1.26773e-10	16.735
FTSJ1	1.11714	5.53736	7.8641	4.30197e-12	1.28884e-10	16.7408
ZMIZ2	1.26154	7.40482	7.86055	4.37813e-12	1.3068e-10	16.703
PLEKHA9	1.48599	1.98924	7.85352	4.53301e-12	1.35054e-10	17.0726
ENGASE	1.85876	6.18678	7.84918	4.63132e-12	1.37437e-10	16.6474
S100A11	1.67084	8.50542	7.84887	4.63854e-12	1.37437e-10	16.6639
DHX37	1.14898	5.39422	7.8453	4.72111e-12	1.39627e-10	16.6565
DGAT2	1.89595	5.01724	7.83555	4.95417e-12	1.45985e-10	16.6358
C1orf135	2.26971	2.30497	7.83082	5.07133e-12	1.48894e-10	16.9388
CBX3	1.14084	8.14608	7.82831	5.1347e-12	1.50481e-10	16.5568
NAT9	1.26084	5.04321	7.81974	5.35663e-12	1.56135e-10	16.5563
HM13	1.40075	7.88971	7.81661	5.4402e-12	1.58001e-10	16.4952
E2F3	1.1538	5.08399	7.81414	5.5069e-12	1.59606e-10	16.5257
CDC25B	2.27195	7.06797	7.81383	5.51524e-12	1.59606e-10	16.4713
PKP1	3.98566	2.66409	7.79002	6.20362e-12	1.77617e-10	16.7074
POLM	1.14392	4.58235	7.76601	6.98366e-12	1.98193e-10	16.3393
CCDC150	2.68578	0.66585	7.76384	7.05897e-12	1.99979e-10	16.696
C9orf140	1.94332	6.37663	7.75179	7.49095e-12	2.11106e-10	16.169
DSCC1	1.58826	3.92112	7.74628	7.69726e-12	2.16442e-10	16.3295
SNTB1	2.16924	5.99443	7.74574	7.71791e-12	2.16442e-10	16.1457
C3orf26	1.39276	4.7347	7.73726	8.04722e-12	2.2521e-10	16.1826
UHRF1	1.84637	4.38639	7.73384	8.18424e-12	2.28649e-10	16.2057
RAD54B	1.78069	3.0241	7.72075	8.72968e-12	2.42211e-10	16.3303
RFC3	1.70255	5.36328	7.70906	9.24673e-12	2.55678e-10	15.9932
CKAP2	1.58838	6.00475	7.70746	9.32004e-12	2.57265e-10	15.9588
CDCA7	1.67593	7.29635	7.68975	1.0169e-11	2.78319e-10	15.8676
SET	0.867922	8.66164	7.68576	1.0371e-11	2.83368e-10	15.8704
PRSS22	3.27636	3.68012	7.68056	1.06394e-11	2.89234e-10	16.0451
ZNF786	1.05293	3.15341	7.67772	1.07895e-11	2.92822e-10	16.1052
RECQL4	2.32876	4.94722	7.66641	1.14068e-11	3.08022e-10	15.8171
TRAF5	1.58694	5.80136	7.65647	1.19779e-11	3.22365e-10	15.7164
TFR2	2.91582	1.07032	7.64576	1.26257e-11	3.37341e-10	16.1184
BRCA2	2.10002	3.59346	7.64555	1.26387e-11	3.37341e-10	15.888
IMPDH1	1.5385	6.51397	7.64478	1.26869e-11	3.38066e-10	15.6466
MEST	1.39908	6.43869	7.64065	1.29469e-11	3.4386e-10	15.627
THUMPD2	1.00666	3.54827	7.63721	1.31673e-11	3.48565e-10	15.8541
RPS6KL1	1.657	2.89831	7.61764	1.44959e-11	3.8e-10	15.847
C2orf70	3.23586	0.766013	7.61501	1.46849e-11	3.8309e-10	15.9808
POLR1A	1.22841	5.97213	7.60832	1.51754e-11	3.9461e-10	15.4772
RHPN1	2.73431	3.56154	7.60717	1.52609e-11	3.96194e-10	15.7068
C1orf170	3.03743	0.0104582	7.60496	1.54275e-11	3.98596e-10	15.9471
RBM26	1.03693	5.59295	7.59842	1.59311e-11	4.09784e-10	15.4427
RSL1D1	0.986384	7.99237	7.59601	1.612e-11	4.13841e-10	15.422
FTSJ2	0.885423	5.32395	7.58665	1.68777e-11	4.31919e-10	15.4006
HEATR1	1.13575	5.96251	7.58268	1.72096e-11	4.39022e-10	15.3531
TMEM161A	1.25256	5.28379	7.56526	1.87449e-11	4.73124e-10	15.2995
ZNF485	1.22216	2.10136	7.5644	1.88238e-11	4.74207e-10	15.6697
PLOD3	1.44962	7.61154	7.53658	2.15737e-11	5.36783e-10	15.1276
EGFL6	3.67187	1.16174	7.53278	2.19786e-11	5.46016e-10	15.5746
SND1	1.07046	8.37712	7.53162	2.21045e-11	5.4746e-10	15.1167
SLC3A2	1.28498	7.51628	7.52426	2.29153e-11	5.64078e-10	15.0666
NUFIP1	1.45559	4.27649	7.52338	2.30149e-11	5.6567e-10	15.1987
B3GNTL1	1.66016	2.22179	7.51729	2.37109e-11	5.81006e-10	15.4337
RNF183	3.33318	0.952002	7.51695	2.37505e-11	5.81095e-10	15.507
EIF2S2	1.30357	7.41779	7.51309	2.42037e-11	5.90394e-10	15.0112
LOC146880	1.42945	4.29329	7.50966	2.46133e-11	5.98577e-10	15.1302
DDX10	1.06834	5.26472	7.50707	2.49277e-11	6.05311e-10	15.0189
C7orf40	1.58821	4.67562	7.48941	2.71762e-11	6.54988e-10	14.9861
LY6G6E	3.98323	-1.71591	7.48907	2.72221e-11	6.55116e-10	15.3817
C8orf30A	1.54498	5.57925	7.48782	2.73886e-11	6.58142e-10	14.9075
TROAP	2.03157	4.36301	7.4754	2.91037e-11	6.94189e-10	14.9556
ZNF696	1.45422	3.84037	7.45852	3.1606e-11	7.49448e-10	14.9478
SCLY	1.0291	4.48979	7.45437	3.22537e-11	7.62567e-10	14.8384
HELLS	1.59648	3.46056	7.45143	3.27195e-11	7.72342e-10	14.9702
ZBTB12	1.62035	3.22815	7.4509	3.28044e-11	7.72342e-10	15.0008
CCT3	0.985203	8.62042	7.45057	3.28585e-11	7.72342e-10	14.7293
E2F1	1.74606	4.90398	7.44731	3.33848e-11	7.82435e-10	14.7596
ZBTB9	1.15327	3.98332	7.44316	3.40692e-11	7.97318e-10	14.8527
EIF3B	1.25057	8.40757	7.43867	3.48241e-11	8.1263e-10	14.6679
TCF3	1.04844	6.88075	7.4354	3.53834e-11	8.23302e-10	14.6316
NOM1	0.984805	4.96602	7.43238	3.591e-11	8.33804e-10	14.6819
YEATS2	1.08106	5.68796	7.43222	3.59381e-11	8.33804e-10	14.6341
C2CD4A	3.73407	3.24694	7.43079	3.61889e-11	8.38418e-10	14.9016
ARID3A	2.41021	3.93036	7.41994	3.81576e-11	8.80241e-10	14.7488
ZMYND19	1.37668	4.68489	7.41949	3.82418e-11	8.80926e-10	14.6477
CLDN2	5.74592	5.14799	7.41902	3.8329e-11	8.81676e-10	14.6023
SLC19A1	1.52918	4.74582	7.41378	3.93217e-11	8.98237e-10	14.6137
ZNF74	1.16707	4.09197	7.40939	4.01733e-11	9.16269e-10	14.6744
LAS1L	1.21095	6.00874	7.3957	4.29459e-11	9.74004e-10	14.4477
ZNF598	1.06033	6.00132	7.39449	4.32006e-11	9.78406e-10	14.442
KIAA0907	1.53337	5.61393	7.37935	4.65084e-11	1.05037e-09	14.3825
WDR4	1.63532	4.13845	7.36372	5.01872e-11	1.12576e-09	14.4483
FXYD5	1.99335	6.58474	7.36146	5.07421e-11	1.13488e-09	14.2755
NOLC1	1.13923	7.54255	7.33194	5.85822e-11	1.28356e-09	14.139
NOTUM	6.6525	3.49048	7.32724	5.99345e-11	1.30964e-09	14.3698
PRPF3	0.948232	5.55864	7.32601	6.02954e-11	1.31482e-09	14.1286
CHD7	1.45752	6.03607	7.3258	6.03554e-11	1.31482e-09	14.1107
C7orf27	1.24222	6.18812	7.32347	6.10442e-11	1.3267e-09	14.0966
ACTR5	1.20873	4.20492	7.32112	6.17454e-11	1.34014e-09	14.2345
NONO	1.00883	8.87772	7.31908	6.23625e-11	1.35172e-09	14.1008
MLXIPL	3.06558	4.92393	7.31526	6.35285e-11	1.37162e-09	14.1223
C5orf34	1.5093	1.9101	7.30355	6.72514e-11	1.44604e-09	14.4387
MCM10	1.71181	3.54732	7.29933	6.86433e-11	1.47068e-09	14.2277
FGFRL1	1.91354	5.79406	7.29054	7.16374e-11	1.52612e-09	13.9484
NUDCD1	1.22069	5.22051	7.28941	7.20319e-11	1.5325e-09	13.9735
SP6	2.35308	4.30219	7.28872	7.22743e-11	1.53564e-09	14.0661
PRPF4	0.819596	5.61832	7.28365	7.40733e-11	1.56973e-09	13.9225
CCND1	1.51785	7.86653	7.28266	7.44301e-11	1.57316e-09	13.9076
AURKA	1.67856	5.72925	7.27628	7.67726e-11	1.61633e-09	13.8823
BRIX1	1.05448	5.62163	7.25936	8.33426e-11	1.74103e-09	13.8059
SPATA12	2.10924	-0.124149	7.25412	8.54858e-11	1.7789e-09	14.2907
GRHL1	2.59243	2.21567	7.25081	8.687e-11	1.80538e-09	14.1625
GDPD5	2.85153	4.75349	7.25038	8.70489e-11	1.80677e-09	13.8283
EVPL	2.08735	6.58219	7.23921	9.1894e-11	1.89032e-09	13.6886
MGC14436	3.50066	-0.909131	7.22101	1.00364e-10	2.05932e-09	14.1417
C1orf109	0.982184	4.22548	7.21127	1.05212e-10	2.15059e-09	13.7061
NCAPG2	1.2547	5.4473	7.20545	1.08217e-10	2.20364e-09	13.5569
LYAR	1.37454	5.12259	7.20417	1.08893e-10	2.21183e-09	13.5731
SHMT2	1.31479	7.11327	7.20206	1.10009e-10	2.2317e-09	13.5118
EXOSC5	1.39685	5.12737	7.18518	1.19372e-10	2.38566e-09	13.482
CAPN10	1.08151	4.55246	7.18449	1.19767e-10	2.3906e-09	13.5361
GTPBP3	1.17962	4.27221	7.18365	1.2026e-10	2.39451e-09	13.568
S100A2	3.53327	2.07632	7.18069	1.2199e-10	2.42598e-09	13.8427
SNORD1C	2.28495	0.359405	7.17529	1.25221e-10	2.47498e-09	13.9098
LSM14B	1.0836	6.32863	7.1737	1.26184e-10	2.48794e-09	13.3773
MPHOSPH10	0.78654	5.64722	7.17085	1.27935e-10	2.51021e-09	13.3815
CHPF	1.61019	6.9821	7.17058	1.281e-10	2.51039e-09	13.3607
RRS1	1.45781	5.63977	7.16904	1.29056e-10	2.52606e-09	13.3732
RFWD3	1.12212	5.91945	7.16746	1.30045e-10	2.54233e-09	13.3554
GABRE	2.6647	4.01195	7.16631	1.30771e-10	2.55343e-09	13.5226
LOC349114	1.80447	3.23415	7.16191	1.33585e-10	2.59895e-09	13.6192
FOXP4	1.1387	7.24102	7.16034	1.34603e-10	2.61561e-09	13.3136
ZNF263	0.845376	5.36005	7.15749	1.36467e-10	2.64564e-09	13.3331
WDR3	1.03909	5.71541	7.1539	1.38853e-10	2.68575e-09	13.2977
USP36	1.00606	6.16497	7.15049	1.4116e-10	2.72335e-09	13.2689
ZNF526	0.869247	4.1263	7.15009	1.41434e-10	2.72538e-09	13.4286
FBXO41	1.96468	4.1199	7.14585	1.44361e-10	2.76858e-09	13.4094
PDCD11	1.20477	6.2563	7.14301	1.46353e-10	2.80345e-09	13.2318
ZNF202	0.938916	3.91255	7.13926	1.49025e-10	2.85125e-09	13.4088
CMTM8	1.29805	3.7008	7.13777	1.501e-10	2.86503e-09	13.4342
ZFP64	0.910219	5.09885	7.13592	1.51444e-10	2.88386e-09	13.2494
ZNF142	0.877175	4.87561	7.13463	1.5239e-10	2.89164e-09	13.2632
RCN1	1.48869	7.68919	7.13402	1.52839e-10	2.89676e-09	13.194
CENPF	1.71858	6.26134	7.12979	1.55992e-10	2.9427e-09	13.1688
ZNF746	0.78656	4.72992	7.12219	1.61824e-10	3.04561e-09	13.219
TAF1A	1.44394	2.50475	7.12168	1.62218e-10	3.04947e-09	13.5219
ATXN2L	0.845202	7.14061	7.11421	1.68173e-10	3.14679e-09	13.0929
TNS4	3.134	6.03579	7.11421	1.68174e-10	3.14679e-09	13.0985
ARMC10	1.02926	5.72658	7.11021	1.71444e-10	3.19946e-09	13.0891
GGCT	1.31164	6.54802	7.10409	1.76582e-10	3.28129e-09	13.0438
TAF1D	1.23062	5.54184	7.10192	1.78435e-10	3.31191e-09	13.058
KCNJ14	2.07722	0.947209	7.09946	1.80566e-10	3.34762e-09	13.5331
NFXL1	1.02439	4.02194	7.09854	1.81371e-10	3.351e-09	13.1988
QTRTD1	0.960833	5.22694	7.0949	1.84577e-10	3.40245e-09	13.0442
E2F7	1.93794	2.78536	7.07773	2.00495e-10	3.67042e-09	13.2813
WDR12	1.07245	5.27722	7.07734	2.00865e-10	3.67042e-09	12.9572
RRP9	1.37669	5.39939	7.07727	2.00932e-10	3.67042e-09	12.9488
DNMT3B	2.14108	2.43737	7.07426	2.03871e-10	3.71151e-09	13.3053
ILF3	0.852615	8.38848	7.05456	2.24146e-10	4.0532e-09	12.8286
TRIM59	1.28341	3.58158	7.05383	2.24927e-10	4.06277e-09	13.0547
FAM40B	2.19014	2.09604	7.05298	2.25856e-10	4.07424e-09	13.2386
CACNA1D	2.02698	3.8654	7.05278	2.26066e-10	4.07424e-09	13.0057
SPRY4	1.2753	5.69811	7.05224	2.26655e-10	4.0803e-09	12.8147
FAM176A	3.45419	2.24559	7.0432	2.36724e-10	4.24263e-09	13.1786
KLK6	6.55108	1.95575	7.04139	2.38794e-10	4.27499e-09	13.1965
PAICS	1.29499	7.73573	7.03687	2.4404e-10	4.34483e-09	12.7329
PBX4	2.27775	0.681608	7.03547	2.45694e-10	4.36069e-09	13.2447
IFITM1	2.30519	8.38536	7.03543	2.45741e-10	4.36069e-09	12.7377
TRAP1	1.2586	7.43144	7.03251	2.49212e-10	4.41743e-09	12.7077
ESPL1	1.63109	4.60514	7.03021	2.51985e-10	4.4568e-09	12.7965
NOC3L	1.01763	4.47082	7.0194	2.65405e-10	4.67166e-09	12.7617
STC2	3.1985	4.52768	7.01913	2.65752e-10	4.67166e-09	12.7533
KRT17	4.76998	2.69964	7.01749	2.67856e-10	4.70146e-09	13.0079
CCNF	1.48019	4.8901	7.01337	2.73204e-10	4.78493e-09	12.686
OTX1	3.90356	-0.613196	7.00768	2.80781e-10	4.91229e-09	13.1489
RELL2	2.39363	2.0699	7.00736	2.81202e-10	4.91435e-09	13.0267
RPN2	1.14075	9.23093	7.00377	2.8609e-10	4.98357e-09	12.6034
FAM72D	1.81012	2.1177	7.00229	2.88141e-10	5.0139e-09	12.9985
WDR77	1.29091	6.20715	6.99768	2.94582e-10	5.10397e-09	12.542
C20orf151	2.06802	3.8149	6.99331	3.00821e-10	5.20649e-09	12.7324
ATXN7L2	1.32521	2.23283	6.99021	3.05326e-10	5.26753e-09	12.9309
RPIA	1.1601	6.09901	6.98594	3.1165e-10	5.35945e-09	12.4884
SAMD10	1.71872	3.80152	6.98357	3.15211e-10	5.41492e-09	12.6886
PASK	1.26113	3.96841	6.98101	3.19106e-10	5.47601e-09	12.6507
PTCD1	1.00515	4.99787	6.97516	3.28179e-10	5.62572e-09	12.4952
FJX1	2.23053	1.80611	6.97022	3.36043e-10	5.74224e-09	12.8752
CHI3L1	3.4566	4.22338	6.96415	3.4596e-10	5.88958e-09	12.5335
NSUN5P1	2.21166	3.01837	6.96383	3.46489e-10	5.88958e-09	12.7139
NUF2	1.62824	4.15477	6.95526	3.61017e-10	6.0944e-09	12.5014
SLC22A11	4.46073	0.219132	6.95516	3.6118e-10	6.0944e-09	12.8871
C10orf81	3.05789	4.67893	6.95127	3.67968e-10	6.19598e-09	12.4148
ECT2	1.63188	6.53497	6.93166	4.04183e-10	6.74947e-09	12.2267
PRIC285	1.66426	6.51185	6.92953	4.08334e-10	6.81176e-09	12.2167
ZNF692	1.73858	4.23609	6.92809	4.11159e-10	6.84473e-09	12.3617
KIF4A	1.43517	5.26106	6.92489	4.17481e-10	6.92855e-09	12.2367
PDCD2L	1.22838	3.71562	6.92356	4.20155e-10	6.9515e-09	12.4193
FIGNL1	1.19461	4.42045	6.91371	4.40409e-10	7.26428e-09	12.2691
TUT1	0.921609	4.85039	6.90186	4.66083e-10	7.66427e-09	12.1635
CDK5RAP1	1.18312	5.31991	6.89911	4.72248e-10	7.74987e-09	12.1111
EHMT2	1.05536	6.44641	6.89663	4.7788e-10	7.82637e-09	12.062
GPATCH4	1.05871	5.58856	6.88841	4.96996e-10	8.1312e-09	12.0452
RRP15	0.840641	4.93772	6.87988	5.17661e-10	8.45915e-09	12.0515
KIF20A	1.69491	4.51047	6.8797	5.18089e-10	8.45915e-09	12.0977
C22orf29	1.42466	5.03005	6.87649	5.26104e-10	8.55707e-09	12.0271
XPOT	1.27537	6.68495	6.87315	5.34554e-10	8.65794e-09	11.9504
MYBL2	1.98735	6.68359	6.87062	5.41046e-10	8.74555e-09	11.9385
TRIM27	0.81895	6.29847	6.86715	5.50069e-10	8.87365e-09	11.9248
PHF16	1.44907	4.67403	6.86355	5.59599e-10	9.00938e-09	12.0023
AGAP3	1.08001	6.33182	6.84253	6.18583e-10	9.9096e-09	11.8086
UPF3B	1.21551	4.608	6.84231	6.19226e-10	9.91007e-09	11.9103
GPR89A	0.86695	5.09778	6.83195	6.50538e-10	1.03701e-08	11.8121
C11orf82	1.71242	3.24901	6.82165	6.83231e-10	1.08578e-08	12.0141
CCDC64	1.5694	3.8283	6.82147	6.83823e-10	1.08578e-08	11.9226
IRAK1	1.22286	7.84644	6.81931	6.90895e-10	1.09593e-08	11.7083
ODF2	0.927131	5.67376	6.81277	7.12729e-10	1.12504e-08	11.6859
SNHG11	1.4853	3.7061	6.80999	7.22222e-10	1.13669e-08	11.8882
SFTA2	4.79751	-0.414127	6.80797	7.29205e-10	1.14236e-08	12.2249
PDRG1	1.42242	5.27935	6.80792	7.29364e-10	1.14236e-08	11.6855
CCDC99	1.101	3.95413	6.80615	7.35549e-10	1.15069e-08	11.8313
MSH5	1.84882	3.96601	6.80569	7.37126e-10	1.15117e-08	11.8273
ZNF643	1.48086	1.2666	6.79875	7.61888e-10	1.1864e-08	12.1156
ABCC10	1.11134	5.30415	6.79718	7.67573e-10	1.1941e-08	11.6335
KIAA0020	1.22654	5.76694	6.79509	7.75229e-10	1.20485e-08	11.5992
RBM19	0.87395	5.09174	6.78446	8.15411e-10	1.26356e-08	11.5901
PABPC1	1.16705	11.0731	6.78278	8.21949e-10	1.27134e-08	11.5988
SFPQ	0.755556	8.16769	6.78236	8.23603e-10	1.27156e-08	11.541
NAA25	0.933944	5.13269	6.78145	8.27159e-10	1.27403e-08	11.5726
AKAP8L	0.892049	5.28958	6.7814	8.27338e-10	1.27403e-08	11.5606
C8orf55	1.35463	6.04527	6.77255	8.62887e-10	1.322e-08	11.4853
SLC25A22	1.22441	5.02917	6.76784	8.82363e-10	1.35056e-08	11.5177
EXO1	1.54118	3.66766	6.76713	8.85378e-10	1.35389e-08	11.6942
ICA1	1.35605	6.08062	6.76674	8.87002e-10	1.35509e-08	11.4573
C16orf55	1.49816	3.36837	6.76349	9.008e-10	1.37357e-08	11.7245
UBFD1	0.888741	6.17066	6.76277	9.03893e-10	1.37569e-08	11.4371
WDR67	1.08823	3.65412	6.76248	9.05118e-10	1.37626e-08	11.6747
TRIM29	3.22023	5.75124	6.75503	9.37682e-10	1.42443e-08	11.4123
NBEAL2	1.55999	6.84061	6.74425	9.86865e-10	1.48919e-08	11.346
RAD54L	1.61449	3.8698	6.74323	9.91647e-10	1.49237e-08	11.5507
LOC148709	2.28058	0.54085	6.73979	1.00796e-09	1.5141e-08	11.8806
TKT	1.15792	8.69245	6.73793	1.01689e-09	1.52551e-08	11.3432
FAM83H	1.43989	7.50261	6.73781	1.01745e-09	1.52551e-08	11.3214
EPHB4	1.08024	7.20776	6.72921	1.0598e-09	1.58313e-08	11.2777
RBM39	1.01699	7.98996	6.72777	1.06703e-09	1.59099e-08	11.2825
CELSR1	1.80943	5.22916	6.72343	1.0892e-09	1.62158e-08	11.294
HEATR2	1.02878	6.07682	6.71851	1.11491e-09	1.65473e-08	11.2321
KIAA1257	2.97054	1.56787	6.71062	1.15732e-09	1.71453e-08	11.688
SLC7A1	1.43119	7.43499	6.71039	1.15861e-09	1.71486e-08	11.1924
CHTF18	1.71731	4.52373	6.70999	1.16078e-09	1.7165e-08	11.3018
UBE2CBP	1.192	2.38251	6.70637	1.18084e-09	1.74457e-08	11.5928
DLGAP4	0.924669	6.96634	6.70577	1.18418e-09	1.74632e-08	11.1667
COL10A1	6.122	2.5898	6.70081	1.21229e-09	1.78479e-08	11.5429
LSG1	0.707301	5.87791	6.68804	1.28777e-09	1.88702e-08	11.0953
KIF2C	1.45764	5.20013	6.6872	1.29292e-09	1.89285e-08	11.1273
AGT	2.60004	4.39635	6.68693	1.29457e-09	1.89354e-08	11.2109
CIRH1A	0.947302	5.98271	6.68622	1.29892e-09	1.89818e-08	11.0838
TRMT1	1.32018	5.35295	6.68501	1.30637e-09	1.90406e-08	11.1063
GNB1L	1.38437	3.13203	6.6791	1.34335e-09	1.95251e-08	11.3685
DBF4	1.15473	4.61615	6.67761	1.35285e-09	1.96455e-08	11.14
TIMP1	1.72508	7.96393	6.67428	1.37434e-09	1.98861e-08	11.0327
TRIM24	1.10998	5.57087	6.67048	1.3992e-09	2.02095e-08	11.0261
NPRL3	1.05448	5.43392	6.66859	1.41178e-09	2.03367e-08	11.0248
CCDC41	1.04389	3.81675	6.66796	1.416e-09	2.03793e-08	11.2091
NIT2	1.07709	5.50628	6.6647	1.43795e-09	2.06767e-08	11.0026
MYC	1.81461	8.00229	6.66338	1.44692e-09	2.07873e-08	10.9828
POLQ	1.71459	3.5655	6.65898	1.47731e-09	2.1205e-08	11.2078
SDCCAG3	1.01423	5.52042	6.65145	1.53078e-09	2.18753e-08	10.9402
ZNF200	0.920289	3.79821	6.65122	1.53241e-09	2.18792e-08	11.1345
AHCY	1.45742	8.82619	6.64612	1.5697e-09	2.23919e-08	10.9181
LEMD1	4.86393	-0.724921	6.64375	1.58741e-09	2.26244e-08	11.4818
POLR3E	0.798729	5.47975	6.64161	1.6035e-09	2.2829e-08	10.8968
NKPD1	2.6546	-0.697502	6.64146	1.60459e-09	2.2829e-08	11.4709
DUS4L	1.11675	3.21528	6.63819	1.62955e-09	2.3123e-08	11.1666
ZNF282	0.74859	5.60821	6.63312	1.66898e-09	2.36409e-08	10.8506
SQLE	1.55509	6.71998	6.6269	1.71865e-09	2.43018e-08	10.7994
CEBPB	1.31116	5.76316	6.6252	1.73244e-09	2.44755e-08	10.8072
TTPAL	1.08299	5.00312	6.62086	1.76828e-09	2.49381e-08	10.8356
ProSAPiP1	2.01067	5.01423	6.62061	1.77037e-09	2.49459e-08	10.8334
NSUN5P2	2.10679	4.47144	6.61521	1.81592e-09	2.55431e-08	10.8683
C6orf167	1.2768	3.84216	6.61303	1.83471e-09	2.57849e-08	10.9506
PPAN	1.25637	5.27222	6.61257	1.83868e-09	2.58183e-08	10.7753
VARS	1.16184	7.04857	6.6085	1.87429e-09	2.62726e-08	10.7148
UCKL1	1.26321	5.73926	6.60634	1.89343e-09	2.64949e-08	10.7206
ULBP1	2.83734	-0.563704	6.6012	1.93975e-09	2.70962e-08	11.2852
CCT5	0.818435	8.33905	6.59905	1.9595e-09	2.73483e-08	10.6905
NSUN5	1.11105	5.48918	6.59839	1.96563e-09	2.74102e-08	10.6958
NFKBIL2	1.54723	4.78524	6.59491	1.99809e-09	2.78148e-08	10.7371
OGFR	1.26694	6.3303	6.59081	2.03694e-09	2.83018e-08	10.6344
MYADML2	4.49018	0.414548	6.5898	2.04666e-09	2.8393e-08	11.1998
SLC7A11	1.87186	4.23886	6.58462	2.09717e-09	2.90189e-08	10.7583
PKP4	0.806556	6.65445	6.58184	2.12473e-09	2.93501e-08	10.5907
AZGP1	3.34881	5.69468	6.58033	2.13988e-09	2.95339e-08	10.602
ASXL1	1.05915	6.58146	6.57725	2.1711e-09	2.99393e-08	10.5697
JAG2	1.92837	5.07407	6.57121	2.23359e-09	3.07486e-08	10.5994
RCL1	1.0749	4.55022	6.56777	2.26992e-09	3.10896e-08	10.6388
FANCF	0.935159	5.09352	6.56737	2.27427e-09	3.10972e-08	10.58
PFDN4	1.38802	5.14705	6.56736	2.27432e-09	3.10972e-08	10.5756
SNAI1	1.90839	2.53831	6.56522	2.29734e-09	3.13588e-08	10.9241
ADCY3	1.20036	6.11197	6.55652	2.39307e-09	3.25006e-08	10.4792
SRD5A1	1.18649	4.56154	6.5559	2.40006e-09	3.25408e-08	10.5826
PVR	1.0493	6.46483	6.55048	2.46189e-09	3.31764e-08	10.4466
DTL	1.37045	4.53238	6.54403	2.53759e-09	3.40623e-08	10.5314
SS18L1	1.15054	4.77095	6.53998	2.58625e-09	3.46579e-08	10.4848
CSNK1E	0.859119	6.70866	6.53729	2.61913e-09	3.50403e-08	10.3846
PSPH	1.366	4.56364	6.53589	2.63635e-09	3.52416e-08	10.49
HDGF	0.986717	8.95609	6.5317	2.68868e-09	3.58816e-08	10.3908
TARS2	0.851629	5.01729	6.5301	2.70896e-09	3.60927e-08	10.4146
FUS	0.773771	8.03165	6.52025	2.83685e-09	3.76432e-08	10.3205
PLAGL2	1.58399	6.7808	6.51809	2.86576e-09	3.79937e-08	10.296
PHF14	1.07269	5.78713	6.51029	2.97233e-09	3.92776e-08	10.2749
PMS1	0.776654	4.02015	6.50877	2.99357e-09	3.95259e-08	10.4415
CPNE1	1.71003	7.70894	6.50609	3.03143e-09	3.9993e-08	10.2495
ERCC6L	1.66979	3.23839	6.50456	3.05318e-09	4.02353e-08	10.5477
FNBP4	0.901618	5.81933	6.50317	3.07313e-09	4.03628e-08	10.241
DBF4B	1.27829	3.10623	6.50183	3.09249e-09	4.05337e-08	10.5554
LOC652276	1.39224	1.91695	6.49502	3.19257e-09	4.17438e-08	10.6697
C16orf59	1.68722	2.73506	6.48846	3.29215e-09	4.29762e-08	10.5472
CDK4	1.06746	7.37575	6.48639	3.3242e-09	4.33595e-08	10.1539
CPOX	0.936729	5.03107	6.48504	3.34516e-09	4.35978e-08	10.2059
ANAPC7	0.798816	5.94989	6.4843	3.35675e-09	4.36784e-08	10.15
CDK2	0.892394	5.38328	6.48182	3.39596e-09	4.4082e-08	10.164
SPERT	4.08543	-1.43315	6.48135	3.40339e-09	4.41319e-08	10.7596
GTSE1	1.46824	4.24227	6.47656	3.48052e-09	4.49987e-08	10.2601
SLC4A11	3.841	1.53068	6.47532	3.50068e-09	4.52232e-08	10.6135
ATR	1.05371	5.21867	6.47426	3.51813e-09	4.53983e-08	10.1407
HAUS5	1.11342	4.33463	6.47392	3.52368e-09	4.54113e-08	10.2349
COX19	1.10883	4.79736	6.4713	3.56703e-09	4.58967e-08	10.1658
IARS	0.969032	7.48439	6.46886	3.60798e-09	4.63866e-08	10.0747
EME1	1.74389	1.98109	6.46605	3.65573e-09	4.69259e-08	10.5315
DIS3	0.908034	6.20426	6.45881	3.78147e-09	4.84629e-08	10.0272
GLS2	2.46421	2.01372	6.45446	3.85901e-09	4.92611e-08	10.4756
KNTC1	1.20146	4.75078	6.45321	3.88151e-09	4.94701e-08	10.0878
MCM7	1.16184	7.90293	6.45293	3.88663e-09	4.94963e-08	10.0083
GRPEL2	0.94608	4.7054	6.45231	3.89798e-09	4.95237e-08	10.0887
DOCK6	1.05301	6.18922	6.44841	3.96947e-09	5.03527e-08	9.97975
NCRNA00152	1.71569	2.91118	6.44662	4.0028e-09	5.06959e-08	10.3316
GIT1	0.977758	6.65097	6.44579	4.01838e-09	5.08533e-08	9.96358
FANCB	1.77261	0.955631	6.44223	4.08567e-09	5.15836e-08	10.5026
C17orf86	1.3757	2.59357	6.44152	4.09926e-09	5.17147e-08	10.3514
?|155060	1.54347	2.96232	6.43771	4.17262e-09	5.25171e-08	10.2836
MTERFD1	1.13807	4.38028	6.43741	4.17842e-09	5.25455e-08	10.0611
DDX11	1.42989	5.05511	6.42903	4.34497e-09	5.45588e-08	9.94658
SNORA39	2.22089	-1.10219	6.42628	4.40104e-09	5.51342e-08	10.5089
RTEL1	1.99587	5.54793	6.42586	4.40973e-09	5.52002e-08	9.89749
EZH2	1.21283	4.99514	6.42413	4.44532e-09	5.5513e-08	9.92966
TBRG4	1.06185	7.03994	6.42398	4.44844e-09	5.5513e-08	9.86415
WDR74	1.22732	5.41395	6.42044	4.52237e-09	5.62613e-08	9.88039
TCFL5	1.38046	4.75177	6.41795	4.57516e-09	5.68742e-08	9.9261
NKD1	3.91635	4.85492	6.41552	4.62731e-09	5.74341e-08	9.90388
NR2C2AP	1.18873	4.82112	6.4144	4.65152e-09	5.7646e-08	9.90237
BCL2L1	1.16853	7.64273	6.41263	4.69e-09	5.80173e-08	9.81911
AXIN2	2.37994	7.30338	6.41253	4.69226e-09	5.80173e-08	9.81395
PLCG1	1.20202	6.55354	6.41205	4.70259e-09	5.81006e-08	9.80924
WDR62	1.88721	3.45479	6.40855	4.77995e-09	5.89662e-08	10.074
C15orf42	1.83498	3.64439	6.40082	4.95507e-09	6.08475e-08	10.0078
SMPD4	0.777696	6.75154	6.39998	4.97451e-09	6.09472e-08	9.75346
STIP1	0.885317	7.59484	6.39947	4.98631e-09	6.10033e-08	9.7581
ZNF697	1.56422	3.3607	6.39916	4.99352e-09	6.10412e-08	10.0464
CEP250	1.36949	5.79053	6.39171	5.16961e-09	6.30505e-08	9.73041
PNN	0.893196	6.76667	6.38824	5.25378e-09	6.39805e-08	9.69974
CEP55	1.44323	5.23569	6.38743	5.27357e-09	6.4173e-08	9.7415
MCM2	1.14599	6.43834	6.38239	5.39844e-09	6.55444e-08	9.67429
TAF4	1.19867	5.4712	6.3754	5.57673e-09	6.74044e-08	9.67099
ACVR2B	1.1771	4.03917	6.37137	5.68211e-09	6.8576e-08	9.80949
C12orf11	1.18865	5.10788	6.36638	5.81546e-09	6.99663e-08	9.65561
STX16	1.25958	6.8618	6.36155	5.94737e-09	7.12449e-08	9.57789
CSTF1	0.898309	5.4578	6.3551	6.12804e-09	7.32078e-08	9.5791
KRTAP5-1	2.36708	-0.0341212	6.35454	6.14392e-09	7.33274e-08	10.1561
WDR5	0.995762	6.24573	6.35308	6.18579e-09	7.37726e-08	9.54257
PKMYT1	1.68487	4.65651	6.34765	6.34352e-09	7.54547e-08	9.61601
PNO1	0.944561	5.27101	6.34622	6.38571e-09	7.57653e-08	9.55087
E2F6	0.787036	4.12841	6.34214	6.50768e-09	7.70991e-08	9.66268
TM9SF4	1.05796	7.77037	6.34114	6.53804e-09	7.74019e-08	9.49458
LRRC61	1.06551	4.4695	6.33604	6.6943e-09	7.90202e-08	9.5865
KIF18A	1.40645	3.30894	6.33453	6.74136e-09	7.94595e-08	9.76083
NEK2	1.40302	4.84663	6.33161	6.83343e-09	8.04859e-08	9.52172
RPGRIP1L	1.28663	2.99024	6.32872	6.92531e-09	8.15087e-08	9.78393
ZNRF3	1.44659	5.64716	6.32578	7.02041e-09	8.25077e-08	9.43555
EXOSC3	0.928102	4.61832	6.32326	7.10269e-09	8.3414e-08	9.5096
2022-03-09	1.00228	4.27722	6.3217	7.15429e-09	8.38979e-08	9.54764
PAFAH1B3	1.32246	5.41261	6.32097	7.17846e-09	8.40593e-08	9.42628
DSCR6	3.48515	-0.0311231	6.32001	7.21051e-09	8.43243e-08	10.0015
KLHL31	1.99605	0.653712	6.31998	7.21154e-09	8.43243e-08	9.96876
HKDC1	2.1975	5.89499	6.31964	7.22305e-09	8.43979e-08	9.39795
GPR172A	1.43371	7.07041	6.31776	7.286e-09	8.50104e-08	9.37917
DACH1	2.32992	5.12604	6.31714	7.30694e-09	8.51316e-08	9.42978
SNHG1	1.4788	5.31424	6.30805	7.62112e-09	8.85365e-08	9.37404
ABCC1	1.14012	6.45926	6.3029	7.80461e-09	9.0538e-08	9.31177
ARFGAP1	1.32356	6.89701	6.30244	7.82154e-09	9.06693e-08	9.30867
CPXM1	2.56795	3.27994	6.30145	7.85726e-09	9.09733e-08	9.61555
THOC2	0.946413	6.53535	6.29974	7.91986e-09	9.15461e-08	9.29685
ADRM1	1.26539	7.5404	6.29807	7.98125e-09	9.21859e-08	9.29483
ZNF3	0.855801	5.6971	6.29792	7.98663e-09	9.21859e-08	9.30651
ASPM	1.57107	4.90097	6.29423	8.12397e-09	9.37041e-08	9.34623
PERP	1.26486	9.09492	6.28858	8.33901e-09	9.59789e-08	9.28056
SLC1A5	1.19467	8.20676	6.28189	8.60074e-09	9.85697e-08	9.23313
RRP1	1.25629	5.40995	6.28148	8.61728e-09	9.86893e-08	9.24695
ZNF335	0.91597	4.91911	6.27768	8.76973e-09	1.00345e-07	9.26933
CPSF6	0.595956	6.5473	6.27594	8.84045e-09	1.0103e-07	9.18872
C13orf23	1.56566	7.06847	6.27354	8.93908e-09	1.01941e-07	9.1782
C13orf34	1.33735	4.57247	6.26897	9.1296e-09	1.03893e-07	9.2687
SIGMAR1	1.05244	7.05322	6.26729	9.20086e-09	1.04557e-07	9.14974
CREBZF	0.890415	6.15793	6.2668	9.22163e-09	1.04705e-07	9.1516
UNC5CL	2.62522	3.42311	6.26345	9.3652e-09	1.062e-07	9.42049
TG	3.8889	2.10863	6.26096	9.47352e-09	1.07203e-07	9.5907
YDJC	1.32642	4.71177	6.25102	9.91797e-09	1.11684e-07	9.17063
UBE2O	0.899709	5.52954	6.2463	1.0136e-08	1.1406e-07	9.08051
TRIM65	1.02263	5.07955	6.24566	1.01662e-08	1.14201e-07	9.1093
SHISA2	2.7313	1.27972	6.24558	1.01697e-08	1.14201e-07	9.59649
C8ORFK29	3.11712	-1.27626	6.24244	1.03181e-08	1.15706e-07	9.69535
CNN2	1.06446	7.82994	6.24199	1.03395e-08	1.15866e-07	9.04522
PILRB	1.79333	5.40521	6.2385	1.05073e-08	1.1739e-07	9.05245
CMTM7	1.54273	4.31337	6.23388	1.07333e-08	1.19532e-07	9.14449
CLEC5A	3.08783	0.52431	6.2311	1.08715e-08	1.20987e-07	9.57843
YARS	0.980884	6.90454	6.22848	1.10034e-08	1.22203e-07	8.9733
AARS	0.952294	7.36636	6.22829	1.10128e-08	1.22223e-07	8.9761
NME1	1.41348	6.83301	6.22569	1.11456e-08	1.23527e-07	8.96058
SMARCD1	0.713693	6.27029	6.22315	1.12766e-08	1.24893e-07	8.95215
EPHA1	1.40242	4.81518	6.22023	1.14293e-08	1.26412e-07	9.02007
PRDM12	1.82653	-1.83286	6.21717	1.15913e-08	1.28115e-07	9.59178
TOP2A	1.4042	7.49165	6.21648	1.16283e-08	1.28261e-07	8.92437
CST2	3.93736	-0.975716	6.21336	1.17966e-08	1.2994e-07	9.56022
PRPF38B	0.691156	6.23898	6.20324	1.23585e-08	1.35574e-07	8.86258
FANCA	1.40401	4.75045	6.20272	1.23878e-08	1.35803e-07	8.94808
ZNF146	0.83313	6.7616	6.19881	1.26126e-08	1.38111e-07	8.83907
NCBP2	0.889217	7.00512	6.19173	1.30293e-08	1.4216e-07	8.80774
DLX4	2.19768	-1.05701	6.19144	1.30467e-08	1.42254e-07	9.4657
KIF23	1.34049	4.78849	6.18967	1.31536e-08	1.43322e-07	8.88507
FER1L4	3.67841	2.90894	6.18939	1.31704e-08	1.43409e-07	9.16782
INTS7	0.866392	4.88825	6.18586	1.33854e-08	1.45066e-07	8.85725
PMEPA1	1.87409	7.56598	6.18482	1.34495e-08	1.45662e-07	8.78255
PCSK9	2.90278	5.22171	6.18198	1.36259e-08	1.47375e-07	8.81005
PRICKLE3	0.964225	3.6663	6.18	1.37504e-08	1.48523e-07	9.00414
DTNB	1.22743	3.18405	6.17959	1.37766e-08	1.48706e-07	9.0816
NCOA5	0.793423	6.1729	6.17775	1.38931e-08	1.49863e-07	8.74875
TPD52L2	0.991319	7.57996	6.17663	1.39649e-08	1.50538e-07	8.74584
BMS1	0.764755	6.17933	6.17575	1.40215e-08	1.51047e-07	8.73959
HNRNPU	0.667727	9.08375	6.17142	1.43025e-08	1.53972e-07	8.75053
FAM105B	0.669217	4.87813	6.15431	1.54696e-08	1.65762e-07	8.71628
FLVCR1	1.21288	3.61204	6.15279	1.55782e-08	1.66814e-07	8.89106
TGS1	1.05811	5.37055	6.15017	1.57663e-08	1.68717e-07	8.65624
PODXL2	1.48014	5.47357	6.1489	1.58577e-08	1.69471e-07	8.64429
ZNF707	1.16821	3.6518	6.14821	1.5908e-08	1.69872e-07	8.8639
UCN2	3.11206	-1.5185	6.14204	1.63644e-08	1.74539e-07	9.25853
TBC1D24	0.915535	3.23549	6.13966	1.65432e-08	1.75981e-07	8.89448
PPP1R13L	1.4186	4.81442	6.13671	1.6768e-08	1.78147e-07	8.64406
PSAT1	2.59712	5.46254	6.1367	1.67689e-08	1.78147e-07	8.5901
LY6G6F	3.11397	-2.42435	6.13395	1.69816e-08	1.8017e-07	9.23058
COPS7B	0.744855	5.27716	6.13217	1.71201e-08	1.81485e-07	8.58196
C20orf199	1.68925	7.041	6.12901	1.73696e-08	1.83924e-07	8.5256
ABCE1	0.899124	6.72054	6.12403	1.77699e-08	1.8767e-07	8.50248
MC1R	1.80561	2.17541	6.12289	1.78631e-08	1.88408e-07	8.96584
DGKZ	0.972358	5.95715	6.11804	1.82633e-08	1.92253e-07	8.4851
SORD	1.41851	5.92635	6.11058	1.88967e-08	1.98532e-07	8.45249
KRI1	0.945319	5.15972	6.10749	1.91649e-08	2.01088e-07	8.48032
BLOC1S3	0.833977	4.19097	6.10694	1.92131e-08	2.01463e-07	8.59152
PFDN2	1.03377	5.72426	6.10476	1.94061e-08	2.03223e-07	8.43349
TMEM97	1.33246	6.02631	6.10295	1.95664e-08	2.04636e-07	8.41562
TCOF1	1.25926	6.70505	6.10191	1.966e-08	2.05216e-07	8.4033
ZNF280C	1.37659	2.69123	6.09853	1.9966e-08	2.08142e-07	8.79293
SEC14L2	1.6145	2.83573	6.09355	2.04251e-08	2.12515e-07	8.7502
SEMA4D	0.904019	5.48422	6.08892	2.08604e-08	2.16626e-07	8.37459
CTHRC1	3.18687	4.22255	6.08564	2.11753e-08	2.19473e-07	8.49151
BUB1	1.24536	5.19574	6.08446	2.12893e-08	2.20513e-07	8.37423
FGF18	2.34692	0.166162	6.08346	2.13869e-08	2.21382e-07	8.94333
NIP7	0.819936	5.63841	6.07521	2.22066e-08	2.28986e-07	8.30515
RNASEH2A	1.16813	5.11584	6.06836	2.2911e-08	2.35497e-07	8.30885
LEF1	2.21399	3.55037	6.06654	2.31011e-08	2.37149e-07	8.51589
RAB15	1.13461	6.52546	6.05769	2.4052e-08	2.45973e-07	8.20607
UBAP2	0.823167	6.09725	6.04602	2.53638e-08	2.58733e-07	8.15939
ANXA9	1.89931	2.43924	6.04482	2.55024e-08	2.59983e-07	8.58772
GRHL2	0.927884	5.8775	6.03935	2.61446e-08	2.66026e-07	8.13542
DDX18	0.702599	7.11765	6.03692	2.64347e-08	2.68808e-07	8.11403
POGK	0.69173	6.20653	6.03222	2.70058e-08	2.7427e-07	8.09581
ZNF695	1.86739	1.24969	6.02984	2.72998e-08	2.77082e-07	8.64121
PRPF40A	0.727606	7.19558	6.02924	2.73734e-08	2.77654e-07	8.08046
ZNF182	1.1526	3.30634	6.02149	2.83544e-08	2.87064e-07	8.3564
IER5L	1.79692	3.58968	6.01901	2.86759e-08	2.89955e-07	8.2979
TMPRSS3	2.61739	2.80956	6.01691	2.89508e-08	2.92369e-07	8.41373
USP31	0.809951	4.29593	6.01345	2.9408e-08	2.96245e-07	8.15914
CKAP5	0.953263	7.22686	6.01197	2.96068e-08	2.97791e-07	8.0038
CA9	4.6402	3.01432	6.0119	2.96168e-08	2.97791e-07	8.36074
ARNTL2	1.46948	2.7319	6.00996	2.98783e-08	3.00233e-07	8.39417
GRIN2B	2.78811	-0.407982	6.00616	3.03975e-08	3.04692e-07	8.6316
RNFT2	1.78054	1.16813	6.00449	3.06283e-08	3.06434e-07	8.53594
ULBP2	3.01647	-0.225865	6.00371	3.07372e-08	3.07334e-07	8.61283
ZNF239	1.4696	2.5893	6.00025	3.12237e-08	3.11619e-07	8.37099
POLR2D	0.831251	5.30436	5.99928	3.13605e-08	3.12598e-07	7.98633
NUP62CL	1.57756	2.12618	5.99836	3.14924e-08	3.13526e-07	8.41971
POLR1C	1.15584	5.19956	5.9937	3.21648e-08	3.19432e-07	7.96926
NLE1	1.17982	4.77151	5.99158	3.24752e-08	3.22317e-07	8.00071
CDCA5	1.48193	5.50003	5.98897	3.28613e-08	3.25749e-07	7.92796
FBXL19	0.959563	4.93675	5.98816	3.29824e-08	3.26548e-07	7.9681
OGFOD1	0.641957	5.5241	5.98572	3.33484e-08	3.29969e-07	7.91214
NOL10	0.748049	5.62749	5.98367	3.366e-08	3.32645e-07	7.89775
TTK	1.35584	4.5167	5.98222	3.38815e-08	3.34424e-07	7.99001
IL23A	2.46592	0.63704	5.97722	3.46565e-08	3.41024e-07	8.45146
SNORA8	1.22847	4.21037	5.97709	3.46769e-08	3.41024e-07	8.01029
LGR5	2.81439	5.84896	5.97647	3.47756e-08	3.41579e-07	7.85666
SLC22A3	1.80824	4.64988	5.97572	3.48931e-08	3.42317e-07	7.94453
NOC4L	1.10302	4.79017	5.97135	3.55897e-08	3.48516e-07	7.90893
POM121	0.831017	7.28271	5.96811	3.61163e-08	3.52984e-07	7.80952
GTPBP5	1.16269	5.36658	5.96698	3.63011e-08	3.54083e-07	7.83852
ANXA3	1.34746	6.46265	5.96613	3.64402e-08	3.55121e-07	7.79902
MEN1	0.86755	5.5793	5.96558	3.65309e-08	3.55791e-07	7.81985
WDR66	2.25513	0.453497	5.96493	3.66382e-08	3.56621e-07	8.40844
CCDC78	3.17118	0.315996	5.96019	3.74332e-08	3.6392e-07	8.39543
SRRT	0.705151	6.92025	5.95779	3.78413e-08	3.67445e-07	7.76115
SMYD2	0.833844	5.28036	5.95459	3.83929e-08	3.72577e-07	7.78973
CEP164	0.945078	4.54584	5.95244	3.87668e-08	3.75754e-07	7.85429
PHLDA1	2.03859	6.87934	5.95091	3.90365e-08	3.77688e-07	7.73055
UBQLN4	0.848123	6.39618	5.95091	3.90365e-08	3.77688e-07	7.73206
PMAIP1	1.48947	3.59656	5.94933	3.93163e-08	3.79713e-07	7.98827
SCML1	1.59823	4.76748	5.94849	3.94654e-08	3.80925e-07	7.81016
JPH1	1.41066	4.91324	5.94589	3.99311e-08	3.8473e-07	7.78309
NEK5	2.68625	-1.39569	5.9439	4.02922e-08	3.87747e-07	8.39499
GPATCH2	0.731414	3.94954	5.9433	4.04006e-08	3.88558e-07	7.90227
ALG3	1.03163	6.17038	5.93863	4.12613e-08	3.96364e-07	7.68083
OTUB2	1.90515	2.97511	5.93709	4.15502e-08	3.98902e-07	8.03653
ZBTB33	1.00004	5.46921	5.93584	4.17858e-08	4.00913e-07	7.69428
C19orf45	2.34521	0.531854	5.93571	4.18094e-08	4.00913e-07	8.27645
RNF32	1.53905	2.15332	5.935	4.19432e-08	4.01958e-07	8.13802
LRRC36	2.76513	1.01306	5.93159	4.25936e-08	4.07224e-07	8.22791
STX6	0.706055	5.64967	5.93041	4.28215e-08	4.09161e-07	7.66073
LMNB2	1.18841	7.41131	5.92919	4.3058e-08	4.10934e-07	7.63874
PHF20	0.824778	5.98856	5.92562	4.37577e-08	4.16382e-07	7.62726
NCAPH	1.18912	4.69472	5.92419	4.40401e-08	4.18821e-07	7.71104
ARHGAP39	1.35231	4.38818	5.9214	4.45969e-08	4.23369e-07	7.73822
PTK7	1.97301	6.38519	5.91915	4.5053e-08	4.26946e-07	7.59167
TSEN2	1.26954	3.97451	5.9183	4.52251e-08	4.28325e-07	7.78784
MOCS3	1.11499	4.45548	5.91536	4.58284e-08	4.33277e-07	7.70247
FAM72A	1.73632	1.06726	5.90961	4.7031e-08	4.43867e-07	8.12816
SGOL2	1.05381	4.06034	5.90918	4.71225e-08	4.44036e-07	7.73366
RFC4	1.01767	4.52477	5.90824	4.73225e-08	4.45058e-07	7.66178
GNL3L	0.975162	5.57291	5.90783	4.74107e-08	4.45596e-07	7.56469
NAA16	1.07207	4.31802	5.90709	4.75683e-08	4.46329e-07	7.68515
C20orf165	2.04925	-0.535	5.90403	4.82283e-08	4.51473e-07	8.19358
LOC100134713	1.25002	-0.0427871	5.89901	4.93312e-08	4.61262e-07	8.1486
STK31	3.79973	0.252586	5.89725	4.97228e-08	4.64386e-07	8.12518
FAM84B	1.12167	6.26743	5.89574	5.00609e-08	4.67026e-07	7.48981
MGC16121	2.85791	-1.25974	5.89375	5.05129e-08	4.70676e-07	8.17527
REXO4	0.883692	5.40361	5.89359	5.05486e-08	4.70737e-07	7.51169
RBL1	1.29615	3.78228	5.88987	5.14018e-08	4.77307e-07	7.6948
TRAF2	1.05628	5.02857	5.88532	5.24648e-08	4.86338e-07	7.50453
TRPC4AP	0.802967	7.3874	5.88482	5.2581e-08	4.87136e-07	7.44262
IRF2BP2	0.726624	8.32913	5.88365	5.28583e-08	4.89343e-07	7.45397
RNF219	1.02116	4.80796	5.88001	5.3732e-08	4.96092e-07	7.50353
MSX1	2.60572	1.97148	5.87679	5.45137e-08	5.03022e-07	7.90365
GART	0.98448	6.65721	5.87622	5.46546e-08	5.04033e-07	7.40078
ANGPT2	1.66642	3.16585	5.87578	5.47633e-08	5.04747e-07	7.73692
CENPI	1.62743	2.1896	5.86575	5.7286e-08	5.253e-07	7.83083
CKAP2L	1.41359	3.62804	5.86321	5.79434e-08	5.30726e-07	7.60403
HAUS6	1.03807	4.90589	5.8592	5.89959e-08	5.39448e-07	7.4016
GMPS	0.860193	6.0668	5.85869	5.91298e-08	5.40062e-07	7.33029
RANGAP1	1.05678	7.11482	5.85493	6.01369e-08	5.48949e-07	7.30827
CUL4A	0.937706	7.31085	5.854	6.03892e-08	5.50941e-07	7.30607
SLC12A9	1.0991	6.19881	5.85024	6.14163e-08	5.59679e-07	7.29057
FOSL1	2.80294	3.22173	5.85	6.14808e-08	5.59931e-07	7.6149
CST4	4.03767	-1.15738	5.84945	6.16346e-08	5.60719e-07	7.98189
NELF	1.30091	6.39216	5.84906	6.17398e-08	5.61359e-07	7.28288
TXNRD3IT1	1.08825	3.02048	5.84858	6.18728e-08	5.62252e-07	7.64126
NUPL1	0.993572	6.35335	5.84794	6.20514e-08	5.62925e-07	7.27838
SAFB	0.6491	6.79422	5.84582	6.26443e-08	5.67985e-07	7.26698
PPP2R3B	1.4034	3.30582	5.84557	6.27149e-08	5.68306e-07	7.58152
PNPT1	0.944603	5.63271	5.84526	6.28024e-08	5.68779e-07	7.28638
FOXK2	0.695382	6.14524	5.83982	6.43532e-08	5.8071e-07	7.24582
LOC100127888	3.53041	1.96973	5.83905	6.45754e-08	5.81575e-07	7.73941
SLC25A32	0.887494	5.29596	5.838	6.48778e-08	5.83973e-07	7.27471
GRB7	2.13491	5.49295	5.83703	6.51615e-08	5.86199e-07	7.25764
SFRS13A	0.568809	6.65495	5.83462	6.58685e-08	5.9223e-07	7.21797
CENPA	1.418	3.49528	5.83273	6.64297e-08	5.96611e-07	7.49324
PPA1	1.09374	8.37773	5.83191	6.66735e-08	5.98468e-07	7.22752
LUC7L3	0.945421	6.71078	5.82858	6.7675e-08	6.0611e-07	7.19134
PRR19	1.31324	0.373158	5.82542	6.86405e-08	6.13396e-07	7.8075
AMMECR1	1.0137	4.78693	5.82304	6.93745e-08	6.18928e-07	7.25577
NOP14	0.939779	6.28714	5.82101	7.00061e-08	6.24218e-07	7.16107
CCT7	0.747544	8.4206	5.81942	7.05087e-08	6.2766e-07	7.1736
CENPJ	1.24515	4.13093	5.81327	7.2475e-08	6.4339e-07	7.30161
HMGB3	1.27825	6.24768	5.80786	7.4248e-08	6.58044e-07	7.10399
ZNF761	0.882563	4.37598	5.80728	7.44418e-08	6.59265e-07	7.23867
C19orf61	0.882808	5.15033	5.79996	7.6916e-08	6.79824e-07	7.11942
C13orf37	1.15596	5.45547	5.7947	7.87431e-08	6.94453e-07	7.07451
RPAP3	0.629224	5.14998	5.79206	7.96787e-08	7.01938e-07	7.08492
AATF	0.806228	6.33801	5.79145	7.98951e-08	7.03077e-07	7.03106
SLC35C2	0.960672	6.41763	5.79077	8.01384e-08	7.04571e-07	7.02724
POLD2	1.1079	7.12818	5.79045	8.02546e-08	7.05088e-07	7.02577
SPTBN5	3.04441	1.27795	5.79012	8.03729e-08	7.05743e-07	7.59344
RNF114	0.896831	7.43282	5.78959	8.05622e-08	7.07021e-07	7.02536
HSPE1	1.13253	7.60705	5.78598	8.18718e-08	7.17734e-07	7.01216
MFAP2	2.16339	4.17315	5.78567	8.19822e-08	7.18137e-07	7.17446
RP9	1.07764	3.4072	5.78561	8.20067e-08	7.18137e-07	7.30275
C8orf73	2.24751	3.93942	5.78364	8.27306e-08	7.24084e-07	7.20335
LOC646851	1.79623	0.846843	5.78252	8.31451e-08	7.27317e-07	7.59288
SNAPC4	1.10774	4.48339	5.78097	8.37222e-08	7.30782e-07	7.10918
XPO4	1.05292	5.83256	5.7794	8.43093e-08	7.34715e-07	6.9897
SYT7	1.93877	6.09418	5.77514	8.59259e-08	7.4719e-07	6.96374
NUP93	0.800803	5.87995	5.77482	8.60501e-08	7.47867e-07	6.96801
WDR46	0.93312	5.99233	5.77275	8.68489e-08	7.53188e-07	6.95575
DDX54	0.750631	6.76245	5.77197	8.71509e-08	7.55401e-07	6.94366
PLEKHA8	0.999505	2.8737	5.77128	8.74173e-08	7.56898e-07	7.32741
ZNF7	0.971245	4.55189	5.77073	8.76312e-08	7.58343e-07	7.05545
DDX12	1.70931	2.55711	5.77029	8.78047e-08	7.59437e-07	7.36903
C19orf48	1.44434	6.39802	5.7692	8.82316e-08	7.62722e-07	6.93322
ARHGEF19	1.48287	4.00964	5.76712	8.90522e-08	7.68581e-07	7.11976
STC1	2.052	3.73412	5.76614	8.9445e-08	7.71551e-07	7.16192
RBAK	0.844666	4.66851	5.76109	9.148e-08	7.87431e-07	6.9989
ZNF259	0.852816	5.62568	5.75912	9.2284e-08	7.93505e-07	6.90994
PMS2	0.670452	4.73136	5.75693	9.3189e-08	8.00434e-07	6.97331
C3orf31	0.995215	3.52473	5.75586	9.36358e-08	8.03844e-07	7.15322
TCERG1	0.739374	5.85077	5.75452	9.41961e-08	8.07796e-07	6.88051
NUP43	0.823339	5.37619	5.75382	9.44893e-08	8.0988e-07	6.90102
TMTC4	1.21018	5.48359	5.75235	9.51085e-08	8.14755e-07	6.88805
CDCA3	1.40019	4.25142	5.7508	9.5767e-08	8.19092e-07	7.01066
SMARCC1	0.774852	7.74652	5.75011	9.60612e-08	8.21173e-07	6.85805
GLT25D1	0.782043	7.13807	5.74668	9.75406e-08	8.32498e-07	6.83492
GNPDA1	0.951416	6.01112	5.74622	9.7741e-08	8.33767e-07	6.8396
SETD6	0.952809	3.94766	5.7436	9.88856e-08	8.43086e-07	7.02778
CHAF1B	1.25067	3.61317	5.74156	9.97849e-08	8.50304e-07	7.07599
SUV39H1	1.07974	4.42276	5.73508	1.02704e-07	8.72795e-07	6.91762
TIGD1	1.40313	2.68666	5.73498	1.02748e-07	8.72795e-07	7.19796
UTP6	0.665347	5.61828	5.73373	1.03321e-07	8.76735e-07	6.79975
CCDC137	0.998767	5.01709	5.72977	1.05153e-07	8.91811e-07	6.82522
SH3TC2	2.51002	3.31384	5.72939	1.05334e-07	8.92876e-07	7.07453
HAGHL	2.67961	1.5993	5.72465	1.07572e-07	9.1089e-07	7.28271
CHORDC1	1.09545	4.96589	5.72333	1.08207e-07	9.15512e-07	6.80221
USPL1	1.25155	5.07648	5.72328	1.08231e-07	9.15512e-07	6.79157
LRRC6	2.0909	1.88044	5.72063	1.09513e-07	9.24419e-07	7.23674
R3HDM1	0.732883	5.38598	5.7197	1.09965e-07	9.27267e-07	6.75199
FAM188B	1.12043	3.35575	5.71896	1.10326e-07	9.29342e-07	7.02226
NOP16	1.14259	4.72892	5.71762	1.10985e-07	9.33428e-07	6.80271
CSTF3	0.722884	5.04707	5.71457	1.12498e-07	9.45662e-07	6.75635
SERPINA4	4.06151	-1.55471	5.71396	1.12804e-07	9.47743e-07	7.41686
CDC6	1.53586	5.08976	5.71006	1.1477e-07	9.6149e-07	6.73304
SGOL1	1.29673	2.89778	5.71001	1.14798e-07	9.6149e-07	7.05848
DUSP14	1.13836	3.64195	5.70886	1.15382e-07	9.65278e-07	6.92934
FANCI	1.19902	5.82374	5.70879	1.15419e-07	9.65278e-07	6.6827
NUP107	0.909879	5.61648	5.70812	1.15763e-07	9.67065e-07	6.68861
SHISA5	0.783617	7.7282	5.7077	1.1598e-07	9.67878e-07	6.67336
RPF2	1.02895	4.84875	5.70603	1.16843e-07	9.74073e-07	6.73906
ADAM12	3.19826	3.31644	5.70358	1.18118e-07	9.83685e-07	6.96245
CEL	5.01947	3.7174	5.70299	1.18425e-07	9.85736e-07	6.89089
HMGXB3	0.683151	5.82314	5.69933	1.20365e-07	9.9989e-07	6.64167
C6orf134	1.13586	3.63389	5.69931	1.20373e-07	9.9989e-07	6.88943
CPSF3	0.774363	5.77796	5.69906	1.20507e-07	1.00048e-06	6.64219
FOXM1	1.43021	6.13642	5.69854	1.20787e-07	1.00206e-06	6.62968
ZP3	1.6065	4.00236	5.69729	1.21459e-07	1.00632e-06	6.8179
C16orf46	1.01352	0.615274	5.69715	1.21531e-07	1.00641e-06	7.24187
WDR90	1.42879	5.11457	5.69591	1.222e-07	1.011e-06	6.66958
RCC2	0.952848	7.82023	5.69513	1.22626e-07	1.01267e-06	6.62049
KCNH8	2.4395	2.14339	5.69506	1.22664e-07	1.01267e-06	7.09698
COMP	5.56401	2.2368	5.69335	1.23595e-07	1.01931e-06	7.07838
SUV39H2	0.978185	3.81977	5.6932	1.23679e-07	1.01948e-06	6.83098
PDDC1	1.00064	6.10626	5.68936	1.258e-07	1.03538e-06	6.59049
CENPE	1.40588	4.13674	5.67819	1.32176e-07	1.08509e-06	6.71368
TTC27	0.821282	4.64584	5.67656	1.33132e-07	1.09239e-06	6.63494
C1orf112	1.12442	3.62803	5.67569	1.33646e-07	1.09559e-06	6.78843
GPR19	1.43605	0.0482413	5.66724	1.38737e-07	1.13434e-06	7.14892
HNRNPA2B1	0.613717	9.84476	5.66678	1.39017e-07	1.13606e-06	6.53733
CSPP1	0.97458	4.1591	5.66644	1.39226e-07	1.13719e-06	6.65938
ACD	0.948671	4.52491	5.66613	1.39416e-07	1.13816e-06	6.60518
SERPINH1	1.20136	7.61294	5.66594	1.39531e-07	1.13853e-06	6.49063
BCAP31	0.910829	8.66178	5.6629	1.4142e-07	1.15161e-06	6.4974
TYW1	0.611112	5.05315	5.65742	1.44885e-07	1.17627e-06	6.50846
ATP6V1C2	1.94098	3.12604	5.65672	1.45336e-07	1.17934e-06	6.79238
BTBD16	2.73093	-1.3556	5.65441	1.46826e-07	1.18904e-06	7.15939
PROX1	1.86364	3.23268	5.65407	1.47046e-07	1.19023e-06	6.76322
IPO5	0.860275	8.14041	5.65314	1.47653e-07	1.19394e-06	6.4449
RCC1	1.20432	5.92309	5.64761	1.51298e-07	1.2228e-06	6.41464
SETDB1	0.637831	5.43541	5.64368	1.53948e-07	1.24173e-06	6.41993
RIOK1	0.730267	4.99959	5.64168	1.55315e-07	1.25089e-06	6.44563
XKRX	2.42977	2.39844	5.64115	1.55673e-07	1.25314e-06	6.83392
CYP2D7P1	2.57022	-0.230934	5.64101	1.55772e-07	1.25331e-06	7.05328
BAZ1B	0.68878	6.96639	5.64038	1.56205e-07	1.25617e-06	6.37321
XPO1	0.563541	7.69964	5.63931	1.56946e-07	1.26144e-06	6.37707
ZNF878	1.45094	-1.60006	5.63835	1.57609e-07	1.26557e-06	7.09955
WNT3	2.06391	-0.285197	5.63282	1.61498e-07	1.29294e-06	7.02155
NFS1	0.927565	5.47106	5.63051	1.6315e-07	1.30477e-06	6.36105
CCNJ	0.952073	3.88305	5.62842	1.64666e-07	1.31504e-06	6.5409
ELMO2	0.856418	5.55998	5.6249	1.67237e-07	1.33294e-06	6.33173
C15orf62	1.31802	1.44706	5.62212	1.69294e-07	1.34668e-06	6.85822
GTF3A	1.66294	7.65147	5.61987	1.70981e-07	1.35809e-06	6.29254
WHSC2	0.791116	5.54178	5.60943	1.79019e-07	1.41845e-06	6.26618
POLG2	1.04719	2.66208	5.6093	1.79128e-07	1.41861e-06	6.66125
USP40	0.684627	5.50468	5.60864	1.79647e-07	1.42203e-06	6.26491
KIF24	1.22913	3.15306	5.60565	1.82028e-07	1.44017e-06	6.5688
TIGD2	0.916496	2.96903	5.60545	1.82186e-07	1.44072e-06	6.59798
ADNP	0.958218	7.17596	5.60285	1.84279e-07	1.45656e-06	6.21304
DUSP7	0.806747	4.51798	5.60261	1.84478e-07	1.45741e-06	6.33261
DPH2	0.914769	5.46016	5.60081	1.85941e-07	1.46825e-06	6.23391
EXOSC7	0.881875	5.18995	5.59962	1.86916e-07	1.47451e-06	6.24784
CHAC1	1.5874	2.75634	5.59775	1.88461e-07	1.48597e-06	6.59798
RBM12B	0.861328	4.29623	5.59559	1.90256e-07	1.49939e-06	6.3337
PRPF6	1.10723	7.82858	5.59458	1.91104e-07	1.50387e-06	6.18686
MARS	0.762799	6.90459	5.59215	1.93155e-07	1.51853e-06	6.16541
UPF3A	1.03508	5.3823	5.59168	1.93557e-07	1.52021e-06	6.1995
KIAA1751	2.80431	-2.77148	5.59119	1.93973e-07	1.522e-06	6.92567
UBE2V1	0.912897	7.89946	5.59037	1.94669e-07	1.52598e-06	6.17008
CD44	1.07359	8.28017	5.59014	1.94867e-07	1.52679e-06	6.17647
CSNK1G2	0.746059	6.22485	5.58692	1.97645e-07	1.54631e-06	6.14659
RPRD1B	0.787473	6.09233	5.5811	2.02758e-07	1.584e-06	6.12413
TAS2R38	2.54766	-2.32305	5.58062	2.03181e-07	1.58654e-06	6.87549
MYBBP1A	1.13072	6.02389	5.5794	2.04274e-07	1.59431e-06	6.11844
MMP3	4.8298	3.95013	5.5792	2.04452e-07	1.59492e-06	6.31859
PTP4A3	2.11277	5.50757	5.57867	2.04933e-07	1.5967e-06	6.13607
CCT4	0.760666	7.94051	5.57862	2.04977e-07	1.5967e-06	6.12044
SPC25	1.16393	3.64885	5.57738	2.06098e-07	1.60389e-06	6.3626
DCUN1D5	1.00142	4.65784	5.57702	2.06423e-07	1.60564e-06	6.20509
MELK	1.32583	4.86169	5.57394	2.09223e-07	1.62457e-06	6.16845
MSTO1	0.853679	4.55252	5.57242	2.1063e-07	1.63443e-06	6.19863
SHH	2.13754	2.33544	5.57117	2.11782e-07	1.64231e-06	6.54345
DNTTIP1	1.08932	6.24719	5.5711	2.11849e-07	1.64231e-06	6.07846
MLKL	0.910233	4.5822	5.57073	2.12193e-07	1.64419e-06	6.18764
IFRD2	0.923411	6.39246	5.5671	2.15596e-07	1.66816e-06	6.05952
SLC29A2	1.281	4.80695	5.56664	2.16037e-07	1.67077e-06	6.14324
LAGE3	1.11247	4.52466	5.5646	2.17977e-07	1.68416e-06	6.16883
ORC2L	0.727804	4.94953	5.56184	2.20628e-07	1.70057e-06	6.10767
HSPBAP1	0.750883	3.04979	5.56091	2.21523e-07	1.70665e-06	6.39485
PRMT3	1.13552	4.79731	5.555	2.27336e-07	1.74977e-06	6.09455
MCM3	1.02939	7.39783	5.55128	2.31075e-07	1.77517e-06	5.99439
URB1	1.04041	5.76057	5.54643	2.36025e-07	1.81061e-06	5.98579
C20orf46	2.67323	1.92943	5.54149	2.41183e-07	1.84667e-06	6.46647
FAM54A	1.31103	3.09432	5.53932	2.4349e-07	1.86168e-06	6.29558
SMG7	0.795827	7.13115	5.5371	2.4586e-07	1.87891e-06	5.93096
CLCN7	0.872308	6.40335	5.53407	2.49137e-07	1.90203e-06	5.91816
POLR1D	1.13405	7.44087	5.53214	2.51248e-07	1.91556e-06	5.91323
CCDC113	1.54082	3.5706	5.53045	2.53108e-07	1.92792e-06	6.17612
POFUT1	1.23549	7.76634	5.52984	2.53787e-07	1.93218e-06	5.90861
DNAH14	1.70277	1.93605	5.52872	2.55031e-07	1.93982e-06	6.41167
C17orf53	1.29877	2.57515	5.52818	2.55634e-07	1.94349e-06	6.32841
KIF21B	1.50233	4.91852	5.5216	2.63087e-07	1.9964e-06	5.93893
SFXN3	0.993162	5.53909	5.52057	2.64271e-07	2.00255e-06	5.88588
STAU1	0.892809	8.09507	5.51967	2.65315e-07	2.00953e-06	5.87138
RNPS1	0.704406	7.51555	5.51955	2.65453e-07	2.00963e-06	5.86061
EXOSC2	0.876437	4.9383	5.51895	2.66152e-07	2.01397e-06	5.92565
UGGT2	1.06939	4.73849	5.51724	2.68145e-07	2.02811e-06	5.94005
FGF19	4.76591	-0.200895	5.51532	2.70401e-07	2.0423e-06	6.52245
SYNCRIP	0.743363	8.01869	5.51303	2.73124e-07	2.06155e-06	5.84158
GOLGA7B	2.29808	2.94193	5.51237	2.73908e-07	2.06589e-06	6.20594
SLC25A15	1.05616	5.26035	5.51107	2.7547e-07	2.07573e-06	5.86363
ONECUT2	2.43813	1.34236	5.51046	2.76195e-07	2.07925e-06	6.39482
HMGA1	1.36877	8.4973	5.50451	2.83457e-07	2.12896e-06	5.8148
TMEM201	1.06462	4.68377	5.50397	2.84127e-07	2.133e-06	5.89007
FAM123B	1.05267	4.12736	5.50059	2.8834e-07	2.16061e-06	5.95427
ANKS6	1.04334	5.41619	5.49978	2.8937e-07	2.16733e-06	5.80464
TDGF1	2.94025	4.74471	5.49964	2.89548e-07	2.16765e-06	5.86442
PREB	0.758216	6.41	5.49943	2.89809e-07	2.1686e-06	5.77043
LOC647979	0.944575	9.24947	5.49857	2.90893e-07	2.17469e-06	5.80434
GPR4	1.3435	2.39534	5.49635	2.93718e-07	2.19277e-06	6.21844
LRRC16B	2.2182	0.763009	5.49581	2.94417e-07	2.19697e-06	6.37927
ACCN2	1.66946	4.01302	5.49266	2.98482e-07	2.22115e-06	5.93917
PTBP1	0.672184	8.55866	5.48858	3.03828e-07	2.25573e-06	5.74827
SNHG4	1.87221	0.437002	5.48801	3.0459e-07	2.26035e-06	6.36875
BRCA1	1.14164	4.78172	5.4871	3.05797e-07	2.2665e-06	5.80697
TRIM28	0.837893	8.48651	5.48614	3.07081e-07	2.27361e-06	5.73644
KARS	0.714022	7.76924	5.48482	3.08855e-07	2.2836e-06	5.71692
PABPC3	1.17258	4.72769	5.48365	3.10422e-07	2.29414e-06	5.79846
TNFRSF6B	3.30501	3.88538	5.48341	3.10748e-07	2.2955e-06	5.92151
FAM60A	1.03172	7.01499	5.47899	3.16791e-07	2.33693e-06	5.68265
PYCRL	1.41061	4.71321	5.4755	3.21628e-07	2.36936e-06	5.76555
ECE2	1.18412	4.02714	5.47271	3.25553e-07	2.39718e-06	5.85222
TMEM185B	0.77963	4.81886	5.47061	3.28544e-07	2.4181e-06	5.73282
STAMBPL1	0.865231	4.61037	5.46822	3.31971e-07	2.43995e-06	5.74746
STK4	0.818059	6.363	5.46446	3.37439e-07	2.47343e-06	5.62237
RPP40	1.13487	3.10413	5.46246	3.40387e-07	2.49278e-06	5.96833
C8orf51	1.83678	0.413085	5.4616	3.41658e-07	2.49927e-06	6.2599
MIER2	0.747112	4.3353	5.46155	3.41738e-07	2.49927e-06	5.75668
CCNI2	1.38952	3.76222	5.45969	3.44502e-07	2.51493e-06	5.84249
PDIA4	0.919428	8.63383	5.45886	3.45746e-07	2.52287e-06	5.62364
C9orf117	1.53531	-1.08174	5.45588	3.50248e-07	2.55226e-06	6.3195
LOXL2	1.74062	5.80868	5.45168	3.56704e-07	2.59813e-06	5.5808
COL27A1	2.59886	3.19868	5.45093	3.57859e-07	2.60537e-06	5.90375
NUP85	0.717817	5.42961	5.45055	3.5845e-07	2.60732e-06	5.59489
SMARCA4	0.847173	7.55198	5.44833	3.61929e-07	2.63026e-06	5.55851
ACPL2	0.867183	4.25321	5.44702	3.63987e-07	2.64222e-06	5.70748
CLNS1A	0.723676	6.73886	5.44697	3.64065e-07	2.64222e-06	5.54623
PRSS33	4.78555	1.13528	5.44632	3.65091e-07	2.64847e-06	6.14348
STIL	1.16194	4.45427	5.44617	3.65324e-07	2.64897e-06	5.67479
PLK1	1.3013	5.77502	5.44354	3.69526e-07	2.67625e-06	5.5476
FAM122B	1.01126	5.78006	5.4435	3.69584e-07	2.67625e-06	5.54726
CXCL3	2.3673	4.36505	5.44188	3.72185e-07	2.69388e-06	5.66911
MKI67	1.38189	7.5947	5.44165	3.72566e-07	2.69543e-06	5.53093
OTUD6B	0.961885	4.43732	5.44119	3.73304e-07	2.69956e-06	5.65606
CHERP	0.695207	6.43125	5.43686	3.80372e-07	2.74452e-06	5.50484
AZI1	0.994216	3.94063	5.43663	3.80759e-07	2.74588e-06	5.71429
PAPD7	0.67355	4.90753	5.43654	3.809e-07	2.74588e-06	5.57904
TH	2.90252	-0.780312	5.43527	3.83013e-07	2.75865e-06	6.22012
C1orf180	3.1689	-1.21362	5.43484	3.83726e-07	2.76255e-06	6.23807
RPL32P3	1.14836	2.64553	5.43417	3.84842e-07	2.76935e-06	5.92138
IL11	3.81548	0.547071	5.4304	3.91171e-07	2.81239e-06	6.12078
FAM156A	1.25183	5.21715	5.42816	3.94983e-07	2.83717e-06	5.51528
LEPRE1	1.05338	4.61394	5.42694	3.97077e-07	2.84977e-06	5.57242
C13orf29	1.94805	1.87068	5.422	4.05675e-07	2.90632e-06	5.97004
C9orf114	0.819721	5.15624	5.42154	4.06479e-07	2.91079e-06	5.4924
NSUN2	0.619167	6.59027	5.41772	4.13244e-07	2.95661e-06	5.42297
PMFBP1	2.13305	0.94123	5.4156	4.17066e-07	2.98263e-06	6.03072
INTS8	0.842648	5.88366	5.41394	4.20067e-07	3.00209e-06	5.41855
UBE2S	1.48386	4.84108	5.41317	4.21457e-07	3.01004e-06	5.48747
NR1D1	1.27284	4.59058	5.41275	4.22237e-07	3.01427e-06	5.51549
AHSA2	1.52222	4.1519	5.41129	4.24911e-07	3.03202e-06	5.57255
PRKDC	1.22157	8.14831	5.40702	4.32825e-07	3.08168e-06	5.3948
RPUSD1	0.993154	5.1798	5.40409	4.38336e-07	3.1176e-06	5.41681
DTX2	1.02178	6.13859	5.40135	4.43567e-07	3.15122e-06	5.35895
PLAU	1.76862	5.65307	5.40032	4.45533e-07	3.1624e-06	5.37046
GPSM2	1.26932	6.53366	5.40016	4.45853e-07	3.16328e-06	5.34915
KRT7	2.55533	1.58414	5.39909	4.47916e-07	3.17513e-06	5.90495
PHF6	0.945171	5.54442	5.39744	4.51118e-07	3.19362e-06	5.36377
NCAPD2	0.883984	7.09116	5.39292	4.59996e-07	3.25077e-06	5.31918
SPIN4	1.00448	4.39959	5.39147	4.629e-07	3.26987e-06	5.45169
LOC150776	1.11748	4.04794	5.39054	4.64761e-07	3.28035e-06	5.50209
ASNS	1.22537	5.78169	5.39048	4.64876e-07	3.28035e-06	5.32343
C4orf43	0.740998	4.47173	5.39042	4.64994e-07	3.28035e-06	5.43732
AFMID	0.973687	4.65278	5.38684	4.72226e-07	3.32701e-06	5.39862
CTU2	0.992689	4.13862	5.38284	4.80462e-07	3.38208e-06	5.45506
CXCL1	2.5605	5.39401	5.38172	4.82777e-07	3.39542e-06	5.3067
PES1	0.883512	6.77682	5.37958	4.87261e-07	3.42546e-06	5.2619
SRM	1.104	6.1127	5.37607	4.9469e-07	3.47316e-06	5.25307
NUP62	0.595724	6.42985	5.37543	4.96042e-07	3.47962e-06	5.24585
CENPN	1.18956	4.80848	5.37274	5.01835e-07	3.5172e-06	5.32101
ATHL1	2.44998	4.87027	5.37213	5.03163e-07	3.52498e-06	5.31154
AMMECR1L	0.525696	5.41122	5.37138	5.04789e-07	3.53484e-06	5.26215
EIF2AK1	0.71456	8.10275	5.37091	5.05799e-07	3.54038e-06	5.24196
GMEB2	0.819178	5.21269	5.36776	5.12715e-07	3.58568e-06	5.26128
CDK1	1.20762	5.99427	5.36502	5.18809e-07	3.62045e-06	5.20947
SLC29A3	0.811435	3.97684	5.36374	5.2168e-07	3.63735e-06	5.40165
KPNA2	1.11576	7.07625	5.36303	5.23278e-07	3.64691e-06	5.19336
TIMM8A	1.03156	3.67799	5.36267	5.24082e-07	3.64936e-06	5.44905
C6orf15	5.36194	-0.480982	5.36186	5.2591e-07	3.66051e-06	5.90125
RAET1K	2.21546	-2.33273	5.36111	5.27612e-07	3.67078e-06	5.97251
PSRC1	1.23479	3.55942	5.35646	5.38267e-07	3.74169e-06	5.44405
HDAC2	0.762505	7.23508	5.35312	5.46076e-07	3.78944e-06	5.15316
SFRS14	0.856228	5.7109	5.35164	5.49563e-07	3.80983e-06	5.16311
TNPO2	0.709332	6.43922	5.35157	5.49722e-07	3.80983e-06	5.14559
DHX35	0.899205	4.5676	5.35027	5.52794e-07	3.82948e-06	5.25595
MRPL17	0.951117	5.90069	5.34897	5.55908e-07	3.8494e-06	5.1448
PA2G4	0.826951	7.98312	5.34766	5.59046e-07	3.86947e-06	5.14206
IQCB1	0.846827	4.88476	5.34691	5.60844e-07	3.88026e-06	5.20425
DDX51	0.880177	4.82063	5.34669	5.61378e-07	3.88228e-06	5.21041
METTL11A	1.01186	5.02033	5.34578	5.63582e-07	3.89585e-06	5.18595
FAM111A	0.806054	5.38941	5.34537	5.64567e-07	3.90099e-06	5.15445
PMS2L3	1.15957	1.44659	5.34411	5.67634e-07	3.91883e-06	5.68996
HSF4	2.17493	2.13642	5.34288	5.70632e-07	3.93449e-06	5.60865
LTV1	0.832744	5.42496	5.34117	5.74851e-07	3.96019e-06	5.13461
TAZ	0.92597	4.6682	5.33421	5.92299e-07	4.07691e-06	5.17599
EBPL	1.17875	5.62296	5.33392	5.93031e-07	4.08021e-06	5.09312
SMARCD2	0.729045	7.32389	5.33301	5.95365e-07	4.09453e-06	5.06995
CYP2S1	1.28022	7.419	5.33282	5.95831e-07	4.09599e-06	5.07039
PPM1G	0.771297	7.54268	5.33017	6.02666e-07	4.13593e-06	5.06108
ANKLE2	0.542441	6.1776	5.32696	6.11012e-07	4.18965e-06	5.04594
C2orf44	0.731945	3.34318	5.32293	6.21666e-07	4.25909e-06	5.34228
SRPX2	2.60561	4.22107	5.32183	6.24611e-07	4.27745e-06	5.18653
MGC72080	1.50181	2.77206	5.31999	6.29567e-07	4.30408e-06	5.4251
LOC286467	3.56663	-1.37849	5.31841	6.33842e-07	4.32782e-06	5.76711
NOP56	1.32779	7.29466	5.31164	6.52501e-07	4.4402e-06	4.98029
ALKBH2	0.91322	3.8735	5.30914	6.59517e-07	4.48227e-06	5.19124
TCF20	0.862953	6.50571	5.30673	6.66374e-07	4.52697e-06	4.95755
C8orf77	1.7035	-0.576441	5.30585	6.68894e-07	4.54218e-06	5.6767
ASPHD1	2.08963	2.38903	5.30314	6.76681e-07	4.59119e-06	5.41096
CD46	1.0548	8.98494	5.29981	6.86391e-07	4.65512e-06	4.96202
PSMA7	1.15525	8.23365	5.29926	6.88024e-07	4.66424e-06	4.94469
CIAO1	0.470165	6.66751	5.29452	7.02131e-07	4.75622e-06	4.90593
MLL4	0.846348	6.16537	5.29414	7.03272e-07	4.76161e-06	4.90914
FARSA	0.792341	6.56788	5.29396	7.0379e-07	4.76312e-06	4.90394
PTPN12	0.786638	6.52157	5.28786	7.22408e-07	4.88094e-06	4.87878
LARP1	0.809478	8.0796	5.28636	7.27057e-07	4.90825e-06	4.88788
DNAJA1	0.819863	7.51562	5.28597	7.28266e-07	4.91272e-06	4.87622
TRAIP	1.12259	3.07682	5.28595	7.28328e-07	4.91272e-06	5.23451
LY6G6D	4.73736	3.26502	5.28267	7.38602e-07	4.97578e-06	5.18866
DSG1	2.19807	-1.65836	5.28188	7.41086e-07	4.98835e-06	5.62969
PA2G4P4	0.991132	2.30541	5.2777	7.54438e-07	5.074e-06	5.31695
KIAA1524	1.24018	3.79323	5.27716	7.5621e-07	5.0838e-06	5.07238
MSI2	0.973848	4.23138	5.27512	7.62798e-07	5.12382e-06	4.99052
C4orf21	1.27004	2.23761	5.27414	7.66015e-07	5.13902e-06	5.31111
UCKL1AS	1.6764	0.303004	5.27366	7.67569e-07	5.1473e-06	5.48999
RLIM	0.770355	6.10181	5.27141	7.7499e-07	5.19193e-06	4.81579
MFSD2B	1.54487	2.16185	5.27097	7.7644e-07	5.19816e-06	5.30774
PCNXL2	1.33852	3.54927	5.26714	7.89231e-07	5.27722e-06	5.07406
KIAA1274	1.63673	5.31543	5.26691	7.90021e-07	5.28032e-06	4.8324
S1PR5	1.45241	-0.795948	5.26559	7.94476e-07	5.30571e-06	5.52439
TTF2	1.01045	4.94261	5.26362	8.01177e-07	5.34825e-06	4.85108
UBA2	0.681765	7.11299	5.26142	8.08735e-07	5.38979e-06	4.7694
MTAP	0.877559	5.34955	5.26024	8.12807e-07	5.41246e-06	4.80223
PIGU	1.10871	5.99111	5.25905	8.16949e-07	5.43779e-06	4.76713
CELP	4.47046	1.05901	5.25798	8.20689e-07	5.45819e-06	5.36971
TSNARE1	1.27022	4.13204	5.25724	8.23255e-07	5.473e-06	4.93221
PHF8	0.798398	5.83572	5.25568	8.28779e-07	5.50519e-06	4.75798
ZCCHC7	0.707754	4.90743	5.25524	8.30309e-07	5.51309e-06	4.81988
FAM91A1	0.779225	6.35994	5.25431	8.336e-07	5.53001e-06	4.74068
CENPO	0.954603	3.16257	5.2536	8.36125e-07	5.54031e-06	5.08607
TBL2	0.716536	6.20466	5.2497	8.50152e-07	5.62056e-06	4.72366
SLC35E4	1.36958	4.11458	5.24841	8.54814e-07	5.64562e-06	4.89848
CLPB	1.0272	4.05821	5.24762	8.57711e-07	5.66244e-06	4.90438
LOC727896	1.05262	0.730314	5.24742	8.58458e-07	5.66505e-06	5.35227
MCM6	0.794153	6.21018	5.24639	8.62203e-07	5.6828e-06	4.70985
SPDYC	3.02982	-2.09531	5.24123	8.81347e-07	5.80187e-06	5.48054
PLXNA3	1.20313	5.62913	5.24099	8.82275e-07	5.80325e-06	4.70587
TBC1D16	1.07174	4.46142	5.23163	9.18088e-07	6.02409e-06	4.77662
C1orf96	0.834545	3.67649	5.23103	9.20427e-07	6.03699e-06	4.90211
MRPS17	1.00197	4.40411	5.22943	9.26711e-07	6.07327e-06	4.7755
XIRP1	2.72514	-1.29869	5.2292	9.27645e-07	6.07692e-06	5.40147
BFSP1	1.57962	1.33816	5.22796	9.32534e-07	6.09905e-06	5.22196
POM121C	0.706317	5.6932	5.22385	9.48971e-07	6.19151e-06	4.63183
FAM98A	0.606139	5.72926	5.22042	9.62878e-07	6.27464e-06	4.61605
CENPP	1.10507	2.27942	5.21782	9.73568e-07	6.33799e-06	5.07389
ACSL6	3.70197	2.32997	5.21777	9.73777e-07	6.33799e-06	5.06696
C1orf77	0.579388	6.59101	5.21562	9.82712e-07	6.39099e-06	4.57875
LOC642846	1.39444	3.07828	5.21455	9.87188e-07	6.41752e-06	4.93946
FAM3B	4.3688	1.67407	5.21324	9.92696e-07	6.44673e-06	5.12781
PTMA	0.689353	10.5159	5.21197	9.98078e-07	6.47788e-06	4.62864
KIFC1	1.14457	5.52123	5.21073	1.00332e-06	6.50665e-06	4.5864
NUP205	0.792159	6.41138	5.20904	1.01054e-06	6.54734e-06	4.55274
THADA	0.612977	5.36313	5.20898	1.01081e-06	6.54734e-06	4.58905
SRCRB4D	1.167	-0.194119	5.20874	1.01182e-06	6.55126e-06	5.25821
NT5DC2	1.25785	5.75011	5.20727	1.01815e-06	6.58698e-06	4.56089
CPSF1	0.993885	7.01347	5.20432	1.031e-06	6.66209e-06	4.53235
HN1L	0.645433	7.35449	5.20204	1.04097e-06	6.72117e-06	4.52612
KISS1	2.64185	-1.51143	5.20047	1.04793e-06	6.76066e-06	5.29493
UBD	2.73165	5.71812	5.19906	1.05423e-06	6.79861e-06	4.52831
CYP24A1	3.7109	-1.5482	5.19784	1.05971e-06	6.83119e-06	5.28587
SNHG3	1.57162	2.33823	5.19707	1.06316e-06	6.84798e-06	4.98099
TDGF3	2.72281	1.4088	5.19418	1.07624e-06	6.92946e-06	5.07718
ZGPAT	1.04644	5.55739	5.19407	1.07673e-06	6.92988e-06	4.51562
GEMIN5	0.819582	5.1111	5.19344	1.07962e-06	6.94572e-06	4.54485
PDCD5	1.01069	6.03372	5.19309	1.08122e-06	6.9532e-06	4.49314
UTP20	1.04133	5.37034	5.19276	1.08275e-06	6.96027e-06	4.52164
THSD1P1	1.6838	3.6058	5.19166	1.08781e-06	6.98726e-06	4.75257
HAUS7	1.10688	4.6026	5.18972	1.09675e-06	7.03071e-06	4.58481
MARCKSL1	0.854493	8.43783	5.18735	1.10785e-06	7.09905e-06	4.48503
TELO2	0.942429	5.5731	5.18718	1.10861e-06	7.10111e-06	4.48642
LIF	1.49214	4.73732	5.18543	1.11688e-06	7.14553e-06	4.5504
SURF6	0.876866	6.09279	5.18467	1.12045e-06	7.1599e-06	4.45709
ANKRD16	0.723328	3.1043	5.18164	1.13493e-06	7.24667e-06	4.7999
RBMX	0.550047	7.78583	5.17921	1.14664e-06	7.31568e-06	4.4388
TMEM120B	0.877249	4.19826	5.17636	1.16057e-06	7.39457e-06	4.58774
SDAD1	0.542488	5.77722	5.17401	1.17215e-06	7.46076e-06	4.42278
CDC45	1.31819	4.04368	5.17401	1.17215e-06	7.46076e-06	4.60333
STK36	0.92515	4.24959	5.17034	1.19049e-06	7.57151e-06	4.55506
ZNF276	0.803426	4.66677	5.16917	1.19638e-06	7.60299e-06	4.49214
KLC3	2.61968	-0.89687	5.16899	1.19726e-06	7.60558e-06	5.13885
KLK10	3.34031	3.34531	5.16881	1.19819e-06	7.60847e-06	4.70531
CXCL11	2.89038	2.2921	5.16777	1.20346e-06	7.6329e-06	4.86741
MYOM3	2.44791	4.23154	5.1675	1.20487e-06	7.63591e-06	4.54616
RPL36A	1.75813	2.83782	5.16525	1.21637e-06	7.70271e-06	4.77695
GTF2F2	1.08924	5.70794	5.16452	1.22012e-06	7.72343e-06	4.38659
DLL4	0.998725	4.5363	5.16266	1.22975e-06	7.78135e-06	4.48216
FASN	1.32189	8.08176	5.15555	1.26718e-06	8.00877e-06	4.34717
KRT6B	4.75965	1.35509	5.15517	1.26923e-06	8.01861e-06	4.92365
PTDSS1	0.821587	6.96583	5.15491	1.27065e-06	8.0244e-06	4.32876
RDH16	2.09321	-1.65463	5.15461	1.27225e-06	8.03142e-06	5.11687
TIMELESS	0.960137	5.64551	5.15309	1.2804e-06	8.07651e-06	4.34268
CCDC19	1.77935	-0.815245	5.15183	1.28727e-06	8.11668e-06	5.06537
MMP13	3.76769	-0.883118	5.15028	1.29568e-06	8.16652e-06	5.06288
CTNNBL1	0.973525	6.29377	5.14924	1.30136e-06	8.19911e-06	4.30801
SLC6A20	3.39343	3.60833	5.14824	1.30687e-06	8.2291e-06	4.57414
ZNF398	0.542039	4.48318	5.14819	1.30714e-06	8.2291e-06	4.43018
SCARB1	1.05139	6.68383	5.14695	1.31403e-06	8.2693e-06	4.29577
SEC16B	1.56976	4.01034	5.14349	1.3333e-06	8.36768e-06	4.48393
RGS16	1.66047	3.95055	5.14206	1.3414e-06	8.40872e-06	4.48834
ZNF195	0.913732	4.62504	5.14036	1.35101e-06	8.46407e-06	4.37932
AURKAPS1	1.176	-0.486219	5.14025	1.35165e-06	8.46407e-06	4.99976
CCDC120	1.00423	4.68559	5.13989	1.35371e-06	8.46944e-06	4.3697
SBNO2	0.906937	6.35613	5.13836	1.36247e-06	8.51769e-06	4.26259
POLA1	0.998446	5.19477	5.13733	1.36837e-06	8.54797e-06	4.30717
OLR1	3.1858	1.00833	5.13623	1.37472e-06	8.58095e-06	4.87806
STX1A	1.30407	2.98442	5.13493	1.38225e-06	8.62017e-06	4.62925
AMELX	2.80633	-2.6855	5.13261	1.39585e-06	8.68602e-06	5.06322
SMC4	0.920257	6.62818	5.1316	1.40177e-06	8.71948e-06	4.23306
SPNS1	0.642302	5.74545	5.1305	1.40829e-06	8.75667e-06	4.24552
LTB4R	1.36794	2.3211	5.12954	1.41397e-06	8.78862e-06	4.70786
ANKRD13D	0.825587	4.39906	5.12886	1.41804e-06	8.80711e-06	4.36283
CDT1	1.31823	5.18842	5.12738	1.42694e-06	8.85217e-06	4.26697
SHCBP1	1.13302	3.69004	5.1226	1.4559e-06	9.0145e-06	4.45474
MTHFD2	1.0501	6.3784	5.12219	1.4584e-06	9.02305e-06	4.19616
TIGD4	1.52122	-0.184107	5.12209	1.45903e-06	9.02353e-06	4.90766
JARID2	0.749316	4.84691	5.12021	1.47057e-06	9.07405e-06	4.2705
RAD18	0.880959	4.30719	5.11822	1.48298e-06	9.1436e-06	4.33297
C20orf3	1.13066	7.30586	5.11693	1.49102e-06	9.18969e-06	4.17601
CKS2	1.31067	5.72827	5.11495	1.50346e-06	9.25221e-06	4.18264
ZMYND8	0.993958	6.5118	5.11033	1.53293e-06	9.42279e-06	4.14664
IRX5	3.25154	-0.41807	5.10594	1.56148e-06	9.58006e-06	4.85786
ITGA2	1.36849	6.26823	5.10404	1.57395e-06	9.64559e-06	4.12342
ZFC3H1	0.979336	5.39847	5.10331	1.57881e-06	9.67169e-06	4.15301
GIGYF1	1.05703	5.97173	5.10277	1.58236e-06	9.68613e-06	4.12444
FERMT1	1.43911	7.95687	5.10238	1.58497e-06	9.69472e-06	4.12716
SLC38A7	0.865451	3.60221	5.10004	1.60062e-06	9.77936e-06	4.37865
AP1S3	1.16754	3.92263	5.09802	1.61422e-06	9.85871e-06	4.31351
HOMER1	1.52142	2.78793	5.09332	1.64635e-06	1.00398e-05	4.49213
SNHG12	1.43465	3.59303	5.09295	1.64897e-06	1.00519e-05	4.35146
NEIL3	1.37087	2.01605	5.09196	1.6558e-06	1.00745e-05	4.59499
TBX15	2.40232	-0.847375	5.08973	1.67136e-06	1.01654e-05	4.8185
ALG1L	2.2509	1.2016	5.08843	1.68051e-06	1.02133e-05	4.6682
YWHAG	0.652569	8.06118	5.08586	1.69868e-06	1.0316e-05	4.06185
RP9P	1.01572	3.59459	5.08557	1.7007e-06	1.03232e-05	4.32124
PAN3	1.1296	6.1633	5.08406	1.71155e-06	1.03825e-05	4.04371
DNA2	1.23148	3.37835	5.0834	1.7163e-06	1.0407e-05	4.35125
NSUN6	0.770717	3.43948	5.08331	1.71689e-06	1.0407e-05	4.33998
SP5	2.79635	2.82088	5.08204	1.72606e-06	1.04548e-05	4.44117
CENPH	1.12388	3.93039	5.07693	1.76343e-06	1.06651e-05	4.22642
SPRN	1.17433	2.21832	5.07682	1.76418e-06	1.06657e-05	4.50805
FANCD2	1.05521	4.61856	5.07282	1.79398e-06	1.08337e-05	4.10472
HLCS	0.729991	4.78419	5.07238	1.79728e-06	1.08455e-05	4.08276
C20orf11	0.724574	7.06822	5.07205	1.79981e-06	1.08515e-05	3.9908
PDCD2	0.660283	5.79405	5.06931	1.82052e-06	1.09611e-05	3.99409
UBE2I	0.702069	6.98374	5.06879	1.82448e-06	1.09809e-05	3.97712
NUPL2	0.707542	4.79066	5.06692	1.83881e-06	1.10548e-05	4.05984
BBC3	1.2015	4.08208	5.06656	1.84157e-06	1.10672e-05	4.15853
RIN1	1.07595	4.36701	5.06489	1.85449e-06	1.11408e-05	4.10693
GEN1	0.877672	4.46037	5.06452	1.85732e-06	1.11536e-05	4.09223
C13orf27	1.07544	3.27252	5.06145	1.88135e-06	1.12853e-05	4.28121
ADM2	1.43903	3.38821	5.06003	1.89251e-06	1.13396e-05	4.25485
NAA38	0.805296	4.97929	5.05973	1.89493e-06	1.13499e-05	4.01047
OLA1	0.798819	7.04175	5.05935	1.89791e-06	1.13635e-05	3.93907
LARP4	0.620775	6.05163	5.05778	1.91042e-06	1.14307e-05	3.93919
EFTUD2	0.723888	7.05207	5.05772	1.91086e-06	1.14307e-05	3.93252
HTR1D	2.98806	2.10957	5.05574	1.92678e-06	1.15187e-05	4.43713
CPSF4	0.805833	4.93129	5.05566	1.9274e-06	1.15187e-05	3.99879
LUC7L2	0.502279	6.75541	5.05391	1.94152e-06	1.15989e-05	3.91619
C21orf59	0.772301	5.62135	5.0537	1.94327e-06	1.16044e-05	3.93836
SIX1	2.86256	-1.14652	5.0535	1.94491e-06	1.16062e-05	4.69048
PSMD14	0.686064	6.48006	5.05335	1.94612e-06	1.16091e-05	3.91492
FBXO5	0.895166	3.90588	5.05273	1.95118e-06	1.16277e-05	4.13257
ZNF343	0.981069	3.8223	5.05026	1.97136e-06	1.17294e-05	4.13733
FAM150A	3.10126	0.18322	5.05017	1.9721e-06	1.17295e-05	4.59447
ORC5L	0.684238	4.76085	5.04596	2.0071e-06	1.19157e-05	3.97822
EFNA4	0.916444	4.90463	5.04563	2.0098e-06	1.19273e-05	3.96088
ACP1	0.671616	6.90703	5.04321	2.03019e-06	1.20351e-05	3.873
IPO4	1.04505	5.99959	5.04294	2.03248e-06	1.20442e-05	3.88041
CCT2	0.721621	7.77459	5.04262	2.03523e-06	1.20561e-05	3.88081
BGN	2.27447	7.54805	5.04237	2.03734e-06	1.20642e-05	3.87596
BUB1B	1.17135	4.85629	5.04071	2.05151e-06	1.21392e-05	3.94612
CCNB1IP1	0.988229	5.69681	5.04005	2.0572e-06	1.21639e-05	3.87935
PRPF19	0.751192	7.56244	5.03962	2.06084e-06	1.2181e-05	3.86504
TWISTNB	0.700276	5.30875	5.03485	2.10221e-06	1.24073e-05	3.88126
SF3A2	0.788367	6.34352	5.03464	2.10412e-06	1.24141e-05	3.84036
VPRBP	0.656012	5.71035	5.03311	2.11755e-06	1.24796e-05	3.85064
KIF15	0.973599	4.37201	5.03285	2.11984e-06	1.24886e-05	3.97644
MINA	0.622106	5.50857	5.03185	2.1287e-06	1.25362e-05	3.85593
ZNF572	1.12707	1.94271	5.03045	2.14116e-06	1.25958e-05	4.35629
PDZD7	2.14748	-0.928787	5.02924	2.15197e-06	1.26502e-05	4.5826
SRPK1	0.990992	7.43895	5.029	2.15407e-06	1.26579e-05	3.82023
SLCO1B3	4.94186	0.367669	5.02867	2.15707e-06	1.26709e-05	4.49544
RAN	0.714057	8.3002	5.02851	2.1585e-06	1.26747e-05	3.83392
LIG1	0.904309	5.71862	5.02734	2.16908e-06	1.27322e-05	3.82692
CIT	1.12101	4.91252	5.02558	2.18502e-06	1.28118e-05	3.87892
TGDS	1.10517	4.46903	5.02475	2.19258e-06	1.28468e-05	3.93001
PLXNB1	0.949125	6.98944	5.0244	2.19573e-06	1.28606e-05	3.79722
UCA1	3.69791	3.26886	5.02431	2.1966e-06	1.2861e-05	4.13195
NCAPG	1.11651	4.84147	5.02413	2.19827e-06	1.28661e-05	3.88072
C9orf43	1.8583	-1.1939	5.02223	2.21565e-06	1.29585e-05	4.56917
AP3M2	0.918076	4.32511	5.02127	2.22451e-06	1.30056e-05	3.93677
WDR27	1.38553	2.62461	5.02071	2.22973e-06	1.30314e-05	4.22453
RFT1	0.729669	5.00483	5.01998	2.23657e-06	1.30619e-05	3.84698
TSEN54	0.855574	5.36494	5.0181	2.25412e-06	1.31596e-05	3.8094
APOBEC1	2.26585	1.51373	5.01755	2.25921e-06	1.31846e-05	4.35325
PAXIP1	0.738696	4.76528	5.01718	2.26277e-06	1.32006e-05	3.86135
RNF149	0.607042	6.10491	5.01649	2.26922e-06	1.32286e-05	3.77087
NPEPL1	1.07126	5.51756	5.01311	2.30132e-06	1.33916e-05	3.77968
SLMO1	1.55074	1.2424	5.01003	2.33101e-06	1.35449e-05	4.35012
SUZ12P	0.975289	2.65096	5.00965	2.33471e-06	1.35615e-05	4.1761
TMEM79	0.932532	2.81802	5.00566	2.37374e-06	1.3768e-05	4.13376
SPNS3	1.69739	0.825223	5.00503	2.37997e-06	1.37946e-05	4.36644
EEF1E1	0.85322	4.2594	5.00355	2.39461e-06	1.38695e-05	3.87533
PCMTD2	1.10969	6.33411	5.00266	2.40351e-06	1.39111e-05	3.71129
ATP13A1	0.705301	6.60185	5.00054	2.42477e-06	1.40241e-05	3.70066
GINS4	1.1457	3.59947	4.99423	2.48911e-06	1.43551e-05	3.95147
FOXS1	1.67341	0.871658	4.99219	2.51029e-06	1.44609e-05	4.31157
DDIT4	1.41499	6.75199	4.99211	2.51104e-06	1.44609e-05	3.66639
KRT75	4.0909	-1.48359	4.98884	2.54541e-06	1.46327e-05	4.452
SR140	0.68364	6.87955	4.98552	2.58066e-06	1.48248e-05	3.63995
CDC25C	1.10567	3.12323	4.98483	2.58803e-06	1.48618e-05	3.99898
PDPN	1.84862	4.2744	4.97972	2.64349e-06	1.51587e-05	3.7772
NPHP4	1.05279	3.74402	4.97911	2.65013e-06	1.51914e-05	3.8647
ADAMTS14	1.67971	2.80302	4.97764	2.66635e-06	1.52681e-05	4.02393
ADAMTS6	1.87161	0.707269	4.97224	2.7266e-06	1.55842e-05	4.24552
PPP1R14B	0.936705	6.24407	4.96669	2.78993e-06	1.58913e-05	3.56777
KIF26B	2.57864	1.9821	4.96645	2.79271e-06	1.59015e-05	4.0957
XRCC1	0.608288	5.32559	4.96501	2.80939e-06	1.59852e-05	3.59858
ZNF251	1.23716	4.18026	4.96492	2.81047e-06	1.59857e-05	3.73259
LY6G6C	2.85502	-0.574821	4.96142	2.8514e-06	1.62071e-05	4.29377
HOXB8	3.19367	3.75234	4.96042	2.86324e-06	1.62687e-05	3.78834
C1orf104	1.55327	1.78922	4.95987	2.8698e-06	1.63002e-05	4.09274
IL20RA	1.38761	4.77193	4.95869	2.88378e-06	1.63566e-05	3.62537
CSTF2	0.795382	5.02135	4.95816	2.89017e-06	1.63871e-05	3.59661
C1orf35	0.853916	4.05439	4.95712	2.90264e-06	1.64463e-05	3.72211
PRDX1	0.762036	8.51159	4.95072	2.98032e-06	1.6845e-05	3.5251
TOPBP1	0.712456	5.83283	4.94948	2.99571e-06	1.69142e-05	3.50908
PODNL1	1.76048	1.85051	4.93977	3.11815e-06	1.75503e-05	4.00573
FAM113A	1.25482	4.14806	4.93626	3.16359e-06	1.77875e-05	3.62325
DONSON	0.868138	3.68616	4.93496	3.18061e-06	1.78661e-05	3.69851
NUDT5	0.804409	5.60874	4.93465	3.18468e-06	1.7881e-05	3.45952
C20orf4	0.737496	6.22295	4.93457	3.18576e-06	1.7881e-05	3.43936
ZDHHC8	0.876486	4.99914	4.93114	3.23117e-06	1.81107e-05	3.49069
MMP1	3.95544	4.77766	4.92876	3.26291e-06	1.82759e-05	3.50497
TRIM11	0.656343	5.19675	4.92866	3.26432e-06	1.82775e-05	3.4629
ZNF514	1.1808	3.66981	4.92581	3.30282e-06	1.84802e-05	3.66502
LOC100133161	1.74873	0.267004	4.92526	3.31037e-06	1.85161e-05	4.09331
C7orf47	1.11831	4.08186	4.92353	3.33407e-06	1.86293e-05	3.58336
ZXDC	0.577399	5.67513	4.92234	3.35032e-06	1.87071e-05	3.40708
BAT1	0.657946	8.17123	4.92197	3.35546e-06	1.87293e-05	3.4032
FCN3	1.77521	-0.711041	4.9215	3.36195e-06	1.87591e-05	4.14558
FAP	2.71784	3.32803	4.92123	3.36573e-06	1.87737e-05	3.70876
C8orf39	1.3563	-1.51298	4.91999	3.383e-06	1.88542e-05	4.18405
SSBP1	0.792068	6.46346	4.91959	3.38846e-06	1.88744e-05	3.37676
CCNE1	1.44743	3.44379	4.91935	3.3919e-06	1.88871e-05	3.68036
ACBD6	0.665091	4.72863	4.91423	3.46405e-06	1.92622e-05	3.4527
DHCR7	1.17893	6.58556	4.91224	3.49256e-06	1.94074e-05	3.34666
DMBX1	3.45808	-1.94582	4.90746	3.56181e-06	1.97379e-05	4.15513
LZTS1	1.77257	2.25641	4.90699	3.56881e-06	1.97698e-05	3.82404
MAPK15	3.25105	0.216232	4.90319	3.62486e-06	2.00597e-05	4.01037
SNRNP200	0.673647	8.42558	4.90234	3.63768e-06	2.011e-05	3.33006
C2orf48	2.2353	-1.0391	4.9021	3.64123e-06	2.01201e-05	4.08925
HSP90AB2P	1.55822	1.67497	4.90205	3.642e-06	2.01201e-05	3.8769
ZSWIM1	0.965632	4.33552	4.89942	3.68143e-06	2.0324e-05	3.44701
DCAF15	0.702338	5.01594	4.89867	3.6929e-06	2.03804e-05	3.35954
TM4SF19	2.66823	-1.53488	4.89782	3.7058e-06	2.04376e-05	4.09888
DPM2	1.00731	5.54127	4.89753	3.71026e-06	2.04552e-05	3.31496
COMT	0.82203	6.79643	4.89688	3.72003e-06	2.05021e-05	3.28511
RPUSD4	0.713432	5.13998	4.89551	3.74115e-06	2.05974e-05	3.33565
RRP7B	1.28595	2.5025	4.89322	3.77641e-06	2.07521e-05	3.73477
SNHG6	1.1834	6.07085	4.89318	3.77697e-06	2.07521e-05	3.27726
CTU1	1.12589	1.99893	4.89249	3.78778e-06	2.07903e-05	3.80044
GLA	0.987843	5.02693	4.89207	3.79426e-06	2.08188e-05	3.33222
PRKRIP1	0.76177	4.63796	4.89093	3.81209e-06	2.08953e-05	3.37132
MRPL3	0.7036	7.04343	4.88954	3.83392e-06	2.09865e-05	3.25667
MRE11A	0.848355	4.75768	4.88925	3.83846e-06	2.10042e-05	3.34987
TMPRSS13	3.144	2.44052	4.88833	3.85302e-06	2.10696e-05	3.72446
HDAC8	0.769709	3.9895	4.88744	3.8671e-06	2.11323e-05	3.45555
NKAP	0.700275	4.64892	4.88692	3.87524e-06	2.11696e-05	3.354
CHEK2	0.934815	4.24969	4.88579	3.89331e-06	2.12612e-05	3.40599
SEC61A1	0.581696	8.6953	4.88128	3.96593e-06	2.16431e-05	3.25181
LRWD1	0.707175	4.38688	4.881	3.97051e-06	2.16496e-05	3.36614
PCID2	0.802124	5.73708	4.87827	4.01508e-06	2.18743e-05	3.2288
RAD51AP2	2.04959	-2.0703	4.87564	4.05868e-06	2.21044e-05	4.03717
CASP8	0.568544	5.40902	4.87385	4.08845e-06	2.22515e-05	3.22897
BCL11B	1.06601	3.71402	4.87097	4.13694e-06	2.24604e-05	3.43925
ZC3H18	0.633659	6.11044	4.87091	4.13795e-06	2.24604e-05	3.18796
ASB6	0.681625	5.33419	4.86802	4.18718e-06	2.27123e-05	3.21106
EFNA3	1.54547	5.19014	4.86596	4.22268e-06	2.28721e-05	3.21399
LMBR1	0.754716	5.90849	4.8659	4.22371e-06	2.28721e-05	3.17336
EIF2S3	0.906433	8.45826	4.86489	4.24129e-06	2.29595e-05	3.18194
BLM	1.20069	3.75125	4.86443	4.24921e-06	2.29814e-05	3.40667
EIF1AD	0.615515	4.88137	4.86304	4.27345e-06	2.30872e-05	3.23182
SH2D2A	1.26771	2.68994	4.86077	4.31336e-06	2.32872e-05	3.57808
TMEM189	0.746022	6.0672	4.85649	4.3895e-06	2.36667e-05	3.13168
TACSTD2	3.53743	3.50831	4.8538	4.43792e-06	2.39038e-05	3.40884
ETV7	1.58998	3.21267	4.85166	4.47692e-06	2.40978e-05	3.45393
NAA10	1.00777	6.10452	4.8515	4.47987e-06	2.41056e-05	3.11115
FAM86C	0.700994	3.28715	4.85099	4.48918e-06	2.41396e-05	3.43796
RNF24	1.14933	3.15365	4.84919	4.52232e-06	2.43016e-05	3.45466
SFRS17A	0.789778	5.63218	4.84737	4.55613e-06	2.44752e-05	3.11125
FGFR4	1.5237	6.59909	4.84563	4.58857e-06	2.46249e-05	3.08206
TMEM216	0.735105	4.01264	4.84479	4.6042e-06	2.47006e-05	3.28277
SSRP1	0.697782	7.89293	4.84429	4.61364e-06	2.4743e-05	3.0891
VDAC1	0.774841	8.63281	4.84356	4.62751e-06	2.48009e-05	3.10107
CPA4	2.39359	-2.52043	4.84273	4.64312e-06	2.48763e-05	3.92781
EBNA1BP2	0.781252	6.38171	4.8376	4.74125e-06	2.536e-05	3.05185
RRP1B	0.831821	5.95501	4.83683	4.75628e-06	2.54235e-05	3.05695
ELK1	0.629426	5.74437	4.8356	4.7802e-06	2.55345e-05	3.05951
NCAPD3	0.944302	5.59282	4.83424	4.80672e-06	2.56676e-05	3.06135
COPG2	0.755947	4.4758	4.83343	4.82271e-06	2.5736e-05	3.16537
TNK2	1.04484	5.59276	4.83319	4.82734e-06	2.57522e-05	3.05721
C12orf45	0.943071	3.75312	4.832	4.85091e-06	2.58609e-05	3.27834
CNKSR1	1.01121	4.99809	4.82992	4.89208e-06	2.60708e-05	3.08897
PSPC1	0.666107	5.73874	4.8282	4.9266e-06	2.62211e-05	3.03052
GOLT1A	1.72312	3.33872	4.82372	5.01724e-06	2.66508e-05	3.32129
SNRNP70	0.811153	7.18655	4.82248	5.04267e-06	2.67707e-05	2.99228
FBL	0.99751	7.78863	4.82246	5.04313e-06	2.67707e-05	3.00095
NOTCH3	1.50844	6.02524	4.82127	5.0676e-06	2.68829e-05	2.99359
AKR1C4	4.06195	-1.64335	4.81952	5.1037e-06	2.70567e-05	3.80164
POLR1E	0.768854	4.87291	4.81935	5.10723e-06	2.70576e-05	3.06019
GATAD1	0.658849	5.87785	4.81866	5.12166e-06	2.71252e-05	2.98762
OGT	1.03312	7.26325	4.81827	5.12989e-06	2.71598e-05	2.97645
MTPAP	0.59013	4.92696	4.81818	5.13171e-06	2.71606e-05	3.04989
PPPDE2	0.776626	4.25633	4.81661	5.16455e-06	2.73164e-05	3.1316
FAM53A	1.66957	0.299202	4.81623	5.17265e-06	2.73503e-05	3.66478
PPAP2C	1.09815	6.78044	4.81542	5.1896e-06	2.74148e-05	2.96251
RANBP1	0.874599	6.33619	4.81541	5.18993e-06	2.74148e-05	2.96483
NANP	1.10065	3.73653	4.81352	5.22991e-06	2.76161e-05	3.20866
HSP90B1	0.741328	10.0789	4.81345	5.23147e-06	2.76161e-05	3.01161
TFDP1	0.838459	7.44252	4.80753	5.35874e-06	2.8251e-05	2.93647
GPR35	0.935025	6.53478	4.80741	5.36139e-06	2.82558e-05	2.93161
NUP37	0.717678	4.97148	4.80733	5.36318e-06	2.8256e-05	3.00268
SART3	0.546034	6.21342	4.80567	5.39946e-06	2.84286e-05	2.92821
RPL7L1	0.692237	5.85929	4.80459	5.42312e-06	2.85354e-05	2.93291
NCRNA00174	1.35442	2.2082	4.80459	5.42328e-06	2.85354e-05	3.42808
TBC1D4	1.16215	6.07226	4.80442	5.42696e-06	2.85455e-05	2.92608
FAM136A	0.601537	6.15118	4.80416	5.43278e-06	2.85667e-05	2.92344
NCOA6	0.911925	7.03389	4.80247	5.47019e-06	2.87448e-05	2.91228
LIG3	0.732556	5.03567	4.80045	5.51521e-06	2.89719e-05	2.96919
CTPS	0.865015	5.46117	4.79867	5.55516e-06	2.91344e-05	2.92883
EXOSC8	0.982772	4.98508	4.79824	5.565e-06	2.9167e-05	2.96555
NUTF2	0.831583	6.8764	4.79403	5.6607e-06	2.96014e-05	2.87847
R3HDML	2.10502	-0.851315	4.79375	5.66724e-06	2.96251e-05	3.65837
CTPS2	0.849403	5.53867	4.7929	5.68681e-06	2.9709e-05	2.90146
TP53RK	1.06493	5.44598	4.7922	5.703e-06	2.9784e-05	2.90434
EIF5B	0.804256	7.41778	4.79183	5.71164e-06	2.98195e-05	2.87437
C7orf70	0.685316	4.36606	4.79138	5.72194e-06	2.98636e-05	3.01568
CNPY2	0.66949	6.3278	4.79114	5.72759e-06	2.98834e-05	2.8695
RBM12	0.467689	6.8401	4.78766	5.80905e-06	3.02791e-05	2.85339
C9orf100	1.11758	4.07801	4.78608	5.84625e-06	3.04496e-05	3.0408
SUGT1	0.891587	5.78893	4.78404	5.89478e-06	3.06764e-05	2.85484
RNASEN	0.531541	6.05831	4.78387	5.89896e-06	3.06883e-05	2.84566
KLHL17	1.37874	2.14167	4.78246	5.93273e-06	3.0854e-05	3.35073
C17orf56	0.788383	4.31451	4.78189	5.94646e-06	3.09055e-05	2.98635
IFITM3	1.42086	8.71326	4.7808	5.97268e-06	3.10318e-05	2.85565
AGK	0.667657	4.9971	4.78008	5.99013e-06	3.11025e-05	2.89311
CHEK1	0.985691	4.37972	4.77783	6.04499e-06	3.13671e-05	2.96056
BZW2	0.772803	7.26155	4.77751	6.0529e-06	3.13981e-05	2.81625
TTLL9	1.41811	-1.57129	4.77312	6.16143e-06	3.19098e-05	3.62012
ZNF623	0.887117	4.55776	4.76876	6.27115e-06	3.24365e-05	2.90002
EARS2	0.696854	5.28598	4.76739	6.306e-06	3.25854e-05	2.81823
NOC2L	0.831908	6.98541	4.76616	6.33729e-06	3.27156e-05	2.76962
SLC4A2	0.829276	7.1351	4.76578	6.34729e-06	3.27568e-05	2.76908
KIFC2	1.63557	4.49257	4.76102	6.47046e-06	3.33286e-05	2.87877
TNFRSF10B	1.07103	6.24874	4.7607	6.47893e-06	3.33509e-05	2.75125
ATAD3A	1.04694	5.8221	4.76029	6.48969e-06	3.33956e-05	2.76054
KIAA0895L	1.01061	3.74751	4.7599	6.49981e-06	3.34264e-05	2.99678
WBSCR28	2.11863	-2.54443	4.7598	6.50247e-06	3.34283e-05	3.61243
MYO1B	0.786496	6.80345	4.75716	6.57224e-06	3.37344e-05	2.73389
GPR180	0.787636	4.37905	4.75659	6.58747e-06	3.37911e-05	2.87759
ANAPC1	0.801052	5.71335	4.75648	6.59037e-06	3.37953e-05	2.74997
CLCN5	1.07673	4.76705	4.75565	6.61241e-06	3.3876e-05	2.82244
ZC3H3	0.761158	5.13054	4.75367	6.66543e-06	3.4126e-05	2.77736
GNL2	0.678542	6.09793	4.75202	6.71e-06	3.43215e-05	2.72014
C20orf135	1.25288	2.39482	4.75151	6.72394e-06	3.4382e-05	3.19539
NOD1	0.754145	4.26962	4.75102	6.73738e-06	3.44398e-05	2.87258
JRKL	0.787019	4.36113	4.75076	6.74424e-06	3.44639e-05	2.85754
GINS1	1.26652	4.86899	4.74958	6.77663e-06	3.46075e-05	2.78704
IL8	3.03052	4.98437	4.7475	6.8338e-06	3.48774e-05	2.76697
PAK1IP1	0.761474	4.77639	4.74554	6.88802e-06	3.51239e-05	2.78189
ATAD5	1.13996	2.91234	4.74552	6.88861e-06	3.51239e-05	3.09083
FAM189B	0.664168	5.27334	4.74376	6.9377e-06	3.53407e-05	2.72684
PDE7A	0.799074	4.58035	4.74226	6.9796e-06	3.55317e-05	2.7936
CFB	1.6265	6.9376	4.74033	7.03426e-06	3.57874e-05	2.66844
CDR2	0.657271	5.66063	4.73731	7.12025e-06	3.62135e-05	2.6777
KBTBD2	0.511067	6.0717	4.73605	7.15666e-06	3.63591e-05	2.65836
SHB	0.897718	5.49373	4.73601	7.15789e-06	3.63591e-05	2.68159
LOC151162	1.19322	7.53841	4.7357	7.16671e-06	3.63925e-05	2.65657
NPM1	0.880841	9.3256	4.73061	7.31529e-06	3.7077e-05	2.67183
TULP4	0.908642	5.1295	4.72965	7.34356e-06	3.71969e-05	2.68377
LOC440944	1.04659	3.93721	4.72733	7.4126e-06	3.75113e-05	2.83592
ZBTB39	0.744262	4.06368	4.72713	7.41853e-06	3.75296e-05	2.81316
SERPINE1	2.32807	4.86983	4.72574	7.46016e-06	3.77246e-05	2.69405
FCHSD1	0.87648	4.04996	4.72442	7.49982e-06	3.78933e-05	2.80494
IFFO2	1.23712	4.98364	4.72248	7.55867e-06	3.81429e-05	2.66958
UMPS	0.663151	5.50323	4.72025	7.62668e-06	3.84621e-05	2.61967
AGAP6	1.30938	2.34678	4.71779	7.70245e-06	3.88079e-05	3.07177
CDK5	0.920909	4.27449	4.71173	7.89262e-06	3.96546e-05	2.71899
SH3PXD2B	0.940034	5.78327	4.71126	7.90734e-06	3.97039e-05	2.57093
SETD5	0.622437	6.55589	4.71017	7.94197e-06	3.98654e-05	2.55128
THNSL1	0.856068	3.68326	4.70755	8.02629e-06	4.02232e-05	2.80495
OSBPL10	0.680295	4.91781	4.70539	8.09601e-06	4.05001e-05	2.60992
FARSB	0.63491	6.47795	4.70396	8.14256e-06	4.07203e-05	2.52769
MIOS	0.629055	5.12577	4.70204	8.20559e-06	4.10102e-05	2.57682
C6orf48	1.14134	6.34711	4.70153	8.22262e-06	4.10826e-05	2.51945
ENOX2	0.784765	4.54428	4.70088	8.24386e-06	4.1176e-05	2.63753
HMMR	1.17584	4.8531	4.69983	8.27896e-06	4.13385e-05	2.59531
LBX2	1.51416	-1.28431	4.69969	8.28352e-06	4.13485e-05	3.32488
DCTD	0.58435	6.4077	4.69634	8.39565e-06	4.18694e-05	2.49864
ANKRD23	1.07554	0.758714	4.69491	8.4437e-06	4.207e-05	3.16071
PGF	1.48468	2.96747	4.69137	8.56463e-06	4.26331e-05	2.87184
KHSRP	0.558063	7.46436	4.68957	8.6267e-06	4.29156e-05	2.47618
ZNHIT6	0.596559	4.52862	4.68945	8.63079e-06	4.29227e-05	2.59539
PLEKHG5	1.00666	4.68764	4.68894	8.64832e-06	4.29834e-05	2.57264
MEPCE	0.684367	6.10441	4.68803	8.68012e-06	4.31282e-05	2.47107
NUP35	0.640926	4.09781	4.68323	8.84837e-06	4.39236e-05	2.63733
VPS72	0.519751	5.5649	4.67877	9.00803e-06	4.4675e-05	2.45519
COL1A1	2.29404	10.5122	4.67836	9.02284e-06	4.4721e-05	2.49382
PRC1	1.09957	5.96114	4.67818	9.02911e-06	4.47383e-05	2.43662
AHCTF1	0.638023	5.90557	4.67762	9.04935e-06	4.47973e-05	2.43609
NUP155	0.740315	4.797	4.67659	9.08697e-06	4.4956e-05	2.51182
PATZ1	0.726956	5.64699	4.67646	9.09164e-06	4.49653e-05	2.44211
FIP1L1	0.530677	5.35414	4.67625	9.09926e-06	4.49761e-05	2.45866
KLK7	4.29159	-1.16289	4.67574	9.1179e-06	4.504e-05	3.22705
DUS1L	0.783287	7.0005	4.67314	9.21327e-06	4.54416e-05	2.40784
ANGEL1	0.783575	5.10414	4.67142	9.27669e-06	4.57265e-05	2.46019
CCDC22	0.618986	5.17823	4.6702	9.32227e-06	4.59371e-05	2.44895
ZNF337	1.18593	4.32681	4.66942	9.35118e-06	4.60656e-05	2.54722
PABPC4	0.709927	7.34606	4.66887	9.3717e-06	4.61385e-05	2.39451
RNF44	0.757293	6.61079	4.6673	9.43095e-06	4.64019e-05	2.38497
LOC151009	1.18309	3.04079	4.66718	9.43527e-06	4.6409e-05	2.766
KCNQ1OT1	1.72348	2.22114	4.66258	9.61044e-06	4.72131e-05	2.87696
TAF1C	0.890166	5.05958	4.66182	9.63949e-06	4.73154e-05	2.42715
NPAS2	0.904886	5.744	4.66164	9.64657e-06	4.73186e-05	2.38035
ZFP41	0.983941	4.18823	4.6613	9.65947e-06	4.73675e-05	2.53765
SPNS2	1.43513	5.78438	4.65845	9.77023e-06	4.78961e-05	2.36645
G3BP1	0.654472	7.14882	4.65789	9.79214e-06	4.79889e-05	2.35
ZNF646	0.667011	4.87617	4.65671	9.83811e-06	4.81704e-05	2.42608
ZNF367	0.966401	3.99838	4.65541	9.88946e-06	4.84071e-05	2.54705
CDC16	0.830844	6.46358	4.65424	9.93571e-06	4.86188e-05	2.33545
DPAGT1	0.641186	5.89602	4.65364	9.95942e-06	4.87053e-05	2.3438
MST1	2.07067	1.80598	4.6507	1.00771e-05	4.92252e-05	2.88545
UTP18	0.718461	5.50479	4.65068	1.00779e-05	4.92252e-05	2.35027
VMA21	0.818333	5.66488	4.64888	1.01506e-05	4.955e-05	2.33478
RACGAP1	0.913654	6.06211	4.6488	1.01536e-05	4.955e-05	2.32048
ANO9	1.3195	6.34621	4.64822	1.01774e-05	4.96511e-05	2.31336
NUSAP1	1.03638	5.65531	4.64796	1.01879e-05	4.96874e-05	2.33171
FANCL	0.747314	4.0949	4.64779	1.01946e-05	4.97047e-05	2.50122
NEB	2.39696	-0.225692	4.64757	1.02038e-05	4.97349e-05	3.05749
MTHFD1	0.689089	6.68799	4.64711	1.02225e-05	4.97957e-05	2.3069
RBM14	0.545749	6.0671	4.6454	1.02923e-05	5.01057e-05	2.30726
IPO9	0.569894	6.42302	4.63918	1.05504e-05	5.13157e-05	2.27778
FAM110A	0.996825	4.00885	4.6382	1.05917e-05	5.15009e-05	2.47907
WBSCR22	0.771957	6.66054	4.63707	1.06395e-05	5.17179e-05	2.26835
E2F4	0.612935	6.69178	4.63585	1.06913e-05	5.19228e-05	2.26358
SCARNA12	1.56718	-1.66239	4.63501	1.07274e-05	5.20824e-05	3.10182
KIF20B	0.909604	4.73548	4.63449	1.07494e-05	5.21422e-05	2.35682
OVGP1	1.42724	2.39134	4.63403	1.07693e-05	5.22232e-05	2.74362
SLC12A2	1.24707	8.76805	4.63299	1.08139e-05	5.24078e-05	2.28295
PML	0.749167	6.07798	4.63065	1.0915e-05	5.2866e-05	2.2503
TRMT2A	0.774387	4.84657	4.63053	1.09202e-05	5.28756e-05	2.3287
IRAK2	1.515	3.72989	4.62936	1.09711e-05	5.30902e-05	2.4952
TMEM211	3.25997	-0.624375	4.62806	1.10279e-05	5.33331e-05	3.01234
DAGLB	0.631162	4.73611	4.62772	1.10432e-05	5.33909e-05	2.33073
DIO2	1.99646	3.58646	4.6261	1.11142e-05	5.37181e-05	2.50914
HAPLN3	1.50566	3.27487	4.6225	1.12747e-05	5.44614e-05	2.55275
CCDC45	0.737383	4.64259	4.62122	1.1332e-05	5.47054e-05	2.31758
GBX2	2.48496	-2.86307	4.62006	1.13845e-05	5.49421e-05	3.09961
ZNF443	0.793766	2.96047	4.61864	1.1449e-05	5.52204e-05	2.59396
TBL3	0.79448	5.68259	4.6178	1.14872e-05	5.53604e-05	2.21447
C2orf60	0.508642	3.6412	4.61778	1.14883e-05	5.53604e-05	2.46717
IKBKAP	0.565741	5.52815	4.61587	1.15754e-05	5.57375e-05	2.2151
CLK2	0.817268	4.80503	4.61524	1.16047e-05	5.58377e-05	2.27484
ING5	0.673293	4.68737	4.61442	1.16426e-05	5.59873e-05	2.28571
GAD1	3.24849	-0.548998	4.61405	1.16598e-05	5.6053e-05	2.95429
MAP1D	0.960304	2.11805	4.61203	1.17537e-05	5.64541e-05	2.698
PDAP1	0.604728	7.20165	4.61096	1.18036e-05	5.66771e-05	2.17005
HSPA5	0.644431	9.60463	4.60619	1.20289e-05	5.76559e-05	2.19708
PSMC2	0.587744	6.64757	4.60596	1.20402e-05	5.76931e-05	2.14897
NSDHL	0.952592	5.42237	4.60367	1.21498e-05	5.81838e-05	2.17487
SCRIB	0.847116	7.04144	4.60165	1.22477e-05	5.86001e-05	2.1331
ROD1	0.632994	8.02394	4.59753	1.24493e-05	5.94942e-05	2.13183
CCDC18	1.2231	2.13704	4.59085	1.27832e-05	6.09818e-05	2.615
PYCR2	0.587865	6.20899	4.59046	1.28028e-05	6.10393e-05	2.09371
ZNF777	0.517248	4.64911	4.58881	1.28867e-05	6.14209e-05	2.19275
RPS2	0.87362	9.93187	4.58533	1.30656e-05	6.22369e-05	2.12409
NOTCH4	0.984634	3.76903	4.58371	1.31495e-05	6.25629e-05	2.31367
NR6A1	1.35733	0.424298	4.58343	1.31639e-05	6.26128e-05	2.76494
WNT7B	2.57405	-1.68262	4.58056	1.33141e-05	6.32343e-05	2.89947
AXIN1	0.724946	6.33006	4.57974	1.33574e-05	6.34023e-05	2.05108
KLF16	0.842775	5.53198	4.57946	1.33724e-05	6.34549e-05	2.07562
GJA3	2.09933	-1.86639	4.57883	1.34059e-05	6.35952e-05	2.90269
LOC84931	2.74499	-2.81832	4.57811	1.3444e-05	6.37387e-05	2.94255
NFYA	0.642343	5.47965	4.57679	1.35144e-05	6.40534e-05	2.06862
NAA15	0.688089	6.10397	4.57517	1.36011e-05	6.43972e-05	2.0374
CABLES2	0.915815	4.35733	4.57513	1.36029e-05	6.43972e-05	2.18113
ZNF205	0.775936	3.95182	4.57505	1.36077e-05	6.4401e-05	2.24775
EIF3M	0.691613	7.52956	4.57443	1.3641e-05	6.45023e-05	2.03468
FOXK1	0.807615	6.27141	4.57417	1.36546e-05	6.45475e-05	2.03061
WDR59	0.587778	5.31814	4.57253	1.37438e-05	6.49122e-05	2.06327
HPRT1	0.876686	5.64051	4.57132	1.38092e-05	6.5202e-05	2.03891
INHBB	2.34846	2.73527	4.56962	1.39022e-05	6.56027e-05	2.44542
XRCC5	0.439308	8.63972	4.56876	1.39495e-05	6.57947e-05	2.03463
SMG5	0.582224	7.14421	4.56874	1.3951e-05	6.57947e-05	2.00824
UBN2	0.7665	5.08608	4.56861	1.39581e-05	6.58089e-05	2.06752
NEK8	0.930386	2.2193	4.5678	1.40025e-05	6.59799e-05	2.51646
SLC11A2	1.0172	6.53308	4.56717	1.40374e-05	6.6125e-05	2.00134
RBBP6	0.520031	6.08005	4.56648	1.40757e-05	6.62668e-05	2.00481
NCRNA00105	1.97963	1.34042	4.56496	1.41607e-05	6.66472e-05	2.61295
DPM1	0.883189	5.85443	4.56345	1.42453e-05	6.70063e-05	1.9998
SRPRB	0.768079	6.46183	4.5627	1.42874e-05	6.71654e-05	1.98482
FAM72B	1.25531	2.88501	4.56239	1.43048e-05	6.72086e-05	2.39303
EIF3H	0.705401	8.2989	4.56239	1.43049e-05	6.72086e-05	2.00336
ZNF267	0.5847	4.26893	4.55988	1.4447e-05	6.78565e-05	2.13681
ABCB6	1.04951	4.38273	4.55706	1.4609e-05	6.84977e-05	2.10857
NXT1	1.06756	4.6886	4.55622	1.46574e-05	6.86647e-05	2.06354
USP39	0.475631	6.12678	4.55606	1.46665e-05	6.86876e-05	1.96419
GTF3C3	0.588136	5.27571	4.55559	1.46939e-05	6.87958e-05	2.00199
STT3A	0.63301	7.56007	4.55334	1.48246e-05	6.93274e-05	1.9549
CACYBP	0.673284	6.61686	4.55293	1.48486e-05	6.94196e-05	1.94677
GDF15	1.77374	6.64572	4.55172	1.49194e-05	6.97303e-05	1.94211
CYP2B6	2.98231	4.1445	4.54976	1.50348e-05	7.02293e-05	2.11856
PRDX4	0.876354	6.97012	4.54943	1.50547e-05	7.03017e-05	1.93365
FKTN	0.612636	4.89821	4.54315	1.54313e-05	7.19149e-05	1.98954
AEN	0.956738	5.25495	4.54244	1.5475e-05	7.20975e-05	1.95365
TRMT11	0.806169	4.06978	4.54232	1.5482e-05	7.21096e-05	2.1029
C19orf22	0.680374	6.67839	4.54143	1.55362e-05	7.23411e-05	1.90295
UNC93A	2.94051	0.371933	4.54001	1.56235e-05	7.27264e-05	2.60627
NAP1L1	0.836507	8.45485	4.53982	1.5635e-05	7.27589e-05	1.92084
ZNF860	0.987999	1.06475	4.53932	1.56656e-05	7.28803e-05	2.54408
FOXRED2	0.929165	4.48224	4.53822	1.5734e-05	7.31568e-05	2.02285
SEMA5B	1.28613	0.247722	4.53808	1.57423e-05	7.3174e-05	2.60907
INTS1	0.849642	7.36631	4.53669	1.58285e-05	7.35292e-05	1.88889
OSBP2	0.88961	3.33102	4.53663	1.58324e-05	7.35292e-05	2.21606
TGIF1	0.877093	6.32691	4.53632	1.58517e-05	7.35976e-05	1.88599
IMPDH2	0.836932	7.94826	4.53354	1.6026e-05	7.43214e-05	1.88675
FMNL2	0.901722	5.43467	4.53335	1.60377e-05	7.43544e-05	1.90634
DTX3L	0.633607	6.7018	4.53326	1.60434e-05	7.43597e-05	1.87192
C6orf222	1.18666	4.88271	4.53273	1.60771e-05	7.44943e-05	1.95168
MSH6	0.645382	5.88765	4.52968	1.62711e-05	7.52851e-05	1.87039
NUAK2	0.840816	5.3794	4.52651	1.64749e-05	7.61194e-05	1.88401
REG1A	6.27046	3.14904	4.52604	1.65049e-05	7.62142e-05	2.20933
RHBDF1	0.814772	5.46848	4.52379	1.66516e-05	7.68038e-05	1.86804
PVRL1	0.951192	6.7222	4.52325	1.66873e-05	7.69025e-05	1.83394
LRRC37A3	1.42447	2.71296	4.52248	1.67377e-05	7.7113e-05	2.27105
HNRNPL	0.411168	8.272	4.52219	1.67567e-05	7.71785e-05	1.85028
KBTBD6	0.747914	4.28905	4.52098	1.68365e-05	7.75016e-05	1.98631
TCTE3	1.12789	1.43356	4.52063	1.68597e-05	7.75862e-05	2.43649
MDC1	0.873709	5.71745	4.52042	1.6873e-05	7.76256e-05	1.84197
TCN1	4.66968	0.432483	4.51956	1.69303e-05	7.78669e-05	2.52498
EIF2C2	0.942863	4.10813	4.51768	1.70557e-05	7.83766e-05	2.00328
FBXO45	0.67679	5.1964	4.51622	1.71539e-05	7.87831e-05	1.85909
SNRPF	0.92702	5.91933	4.51562	1.71942e-05	7.89231e-05	1.81623
FAAH2	1.00985	3.20432	4.51424	1.72877e-05	7.93073e-05	2.15483
G6PD	0.7722	5.6936	4.51388	1.73118e-05	7.93953e-05	1.81835
MFSD10	0.867561	6.27044	4.51337	1.73468e-05	7.95106e-05	1.79984
DOM3Z	0.914144	3.94609	4.51258	1.74004e-05	7.97111e-05	2.01216
DDX21	1.07467	7.25036	4.51206	1.74357e-05	7.98501e-05	1.79426
DNMT1	0.919967	6.53067	4.51146	1.74765e-05	8.00029e-05	1.79007
METTL13	0.569007	5.82493	4.51143	1.7479e-05	8.00029e-05	1.80369
CDCA4	0.952954	4.62692	4.5113	1.74878e-05	8.00208e-05	1.90146
ALG8	0.766475	5.30605	4.5085	1.76804e-05	8.08541e-05	1.82139
C19orf26	2.09288	-1.21668	4.50814	1.77059e-05	8.09271e-05	2.60376
INO80B	0.907603	3.85573	4.5065	1.78195e-05	8.13999e-05	2.0054
LOC100132287	1.20841	3.34741	4.50572	1.78741e-05	8.16031e-05	2.09653
WIZ	0.53077	5.92127	4.5052	1.79109e-05	8.17249e-05	1.77681
TUBGCP3	0.673306	5.34165	4.50474	1.79429e-05	8.1848e-05	1.80452
DCAF16	0.646998	5.36639	4.5026	1.80938e-05	8.24423e-05	1.79463
ZSWIM3	1.0305	3.38441	4.50245	1.81048e-05	8.2447e-05	2.07736
LIPG	1.25496	4.62977	4.50208	1.8131e-05	8.25428e-05	1.86632
ZNF629	0.644044	5.63106	4.50024	1.82616e-05	8.30673e-05	1.76997
PLOD1	0.713207	7.01329	4.49979	1.82945e-05	8.31932e-05	1.74598
ADO	0.477221	5.00241	4.49837	1.83964e-05	8.35846e-05	1.8095
ZNF317	0.507555	5.3592	4.4983	1.84013e-05	8.35846e-05	1.77892
POMP	0.975917	7.46749	4.49707	1.849e-05	8.39169e-05	1.74051
PRIM2	0.677593	3.69056	4.49663	1.85216e-05	8.40369e-05	1.99857
EMD	0.746007	6.0688	4.496	1.85674e-05	8.42211e-05	1.73806
DLGAP5	1.00032	4.55422	4.49577	1.8584e-05	8.42415e-05	1.85248
CHAF1A	0.849809	5.09035	4.49572	1.85876e-05	8.42415e-05	1.79112
LOC646762	1.23961	4.21078	4.48906	1.90782e-05	8.6199e-05	1.87832
ZNF574	0.599434	4.95218	4.48895	1.90863e-05	8.62114e-05	1.77918
CDC25A	1.19216	4.443	4.48878	1.90992e-05	8.62457e-05	1.84184
C9orf16	1.16776	5.8269	4.48646	1.92729e-05	8.70054e-05	1.70949
RFC2	0.748244	5.13922	4.48628	1.92864e-05	8.7042e-05	1.75124
ENOPH1	0.664237	5.81628	4.48578	1.93245e-05	8.71899e-05	1.70732
ZNF600	0.765946	3.85462	4.48525	1.9364e-05	8.73191e-05	1.92569
VGLL4	0.60449	6.49653	4.48324	1.95168e-05	8.79344e-05	1.68392
C2orf29	0.507665	6.54372	4.48102	1.96866e-05	8.86005e-05	1.67525
C12orf66	0.814766	2.62889	4.47982	1.9779e-05	8.89424e-05	2.12462
MRPL9	0.594138	5.90731	4.47931	1.98183e-05	8.90694e-05	1.67975
GJB4	2.52325	1.4441	4.47829	1.98974e-05	8.93999e-05	2.27732
KLK8	4.43934	-1.29858	4.4775	1.99591e-05	8.96523e-05	2.49598
DNAH2	2.15436	0.648403	4.47723	1.99802e-05	8.97222e-05	2.34957
SHFM1	0.9224	6.78194	4.47539	2.01244e-05	9.02942e-05	1.65348
EEFSEC	0.66464	4.69874	4.47426	2.02133e-05	9.06425e-05	1.75274
CARM1	0.538945	6.68423	4.47322	2.02955e-05	9.09862e-05	1.64541
WISP1	2.1388	2.01552	4.47253	2.03497e-05	9.11785e-05	2.18652
GAS8	0.678406	4.25715	4.47087	2.04822e-05	9.17467e-05	1.80269
NOD2	1.60317	2.45277	4.47058	2.05052e-05	9.18244e-05	2.11745
FAM71E1	1.25161	1.3865	4.46832	2.06864e-05	9.26098e-05	2.24652
MSTO2P	1.14378	1.71293	4.46607	2.0869e-05	9.33757e-05	2.20085
SRMS	2.47723	0.190137	4.4614	2.1252e-05	9.48789e-05	2.32879
COL4A1	1.41056	8.61453	4.46103	2.12825e-05	9.49739e-05	1.62704
DHRS2	2.84796	0.429739	4.461	2.1285e-05	9.49739e-05	2.30774
CLDN9	2.34035	0.188954	4.45984	2.13816e-05	9.5364e-05	2.32312
PIF1	1.43017	2.14011	4.45659	2.16532e-05	9.63687e-05	2.11036
POLD1	0.890072	5.2667	4.45464	2.18182e-05	9.69778e-05	1.62187
TLCD1	1.25034	3.58669	4.45429	2.18482e-05	9.70845e-05	1.85923
ZNF767	1.02458	3.07691	4.45361	2.19064e-05	9.73163e-05	1.95067
C12orf48	1.09229	4.03099	4.45331	2.19313e-05	9.74003e-05	1.77461
TATDN1	0.746939	4.53855	4.45283	2.19726e-05	9.75297e-05	1.69345
PVRL4	1.61949	3.77719	4.45186	2.20555e-05	9.78709e-05	1.81488
ACBD7	1.82507	1.56313	4.45151	2.20861e-05	9.79798e-05	2.16445
EDNRA	1.6385	3.70168	4.44908	2.22956e-05	9.88008e-05	1.81835
PDF	0.933092	3.69781	4.44782	2.24045e-05	9.91608e-05	1.81439
DPY19L1	0.795554	5.8613	4.44782	2.24048e-05	9.91608e-05	1.56319
DNAJA3	0.646448	6.62179	4.44752	2.24307e-05	9.92357e-05	1.54927
SLAMF9	2.2607	-2.23077	4.44469	2.2679e-05	0.000100252	2.42776
IRF3	0.768446	5.94267	4.44393	2.27463e-05	0.000100494	1.54601
TAGLN2	0.732077	9.48471	4.4389	2.31949e-05	0.000102421	1.56191
SPOCD1	1.71009	0.867941	4.43705	2.33624e-05	0.000103075	2.18178
DUS3L	0.790076	4.92312	4.43666	2.33977e-05	0.000103201	1.58617
DNAJC10	0.647106	7.00535	4.43621	2.34384e-05	0.000103326	1.50733
ALDH4A1	1.47435	5.05366	4.43481	2.35658e-05	0.000103746	1.56607
PPIA	0.724692	8.35409	4.43327	2.37069e-05	0.000104339	1.51784
BCL2L12	0.864893	4.40426	4.43166	2.38555e-05	0.000104964	1.63355
LOC100130015	1.5383	-0.389673	4.42834	2.41651e-05	0.000106284	2.25275
PRDM13	2.54345	-2.30847	4.42685	2.43052e-05	0.000106827	2.36676
C5orf46	2.78914	-2.56917	4.42608	2.43773e-05	0.000107085	2.37624
DAP3	0.513524	6.84862	4.42571	2.44127e-05	0.000107212	1.46757
DNMT3A	0.581326	4.81273	4.42353	2.46194e-05	0.000108002	1.5495
CHMP4C	1.12625	5.47856	4.42195	2.47707e-05	0.000108606	1.48501
FBXL6	1.33872	5.50944	4.42146	2.48177e-05	0.000108745	1.48127
WDR92	0.523219	3.66582	4.42128	2.48353e-05	0.000108771	1.72148
CTSL2	1.74696	3.98467	4.41985	2.49725e-05	0.000109313	1.65807
IL1RAP	0.959238	3.2126	4.41712	2.52378e-05	0.000110445	1.79039
C7orf11	0.73393	5.14399	4.41678	2.52712e-05	0.000110531	1.49074
SMYD3	0.724099	3.78118	4.41644	2.53049e-05	0.000110648	1.68218
MASTL	0.741078	4.12778	4.41605	2.5343e-05	0.000110772	1.61924
POP7	0.707317	5.10869	4.41526	2.54209e-05	0.000111035	1.48818
BAT2	0.645966	8.38248	4.41432	2.55134e-05	0.000111409	1.44777
KDM1A	0.725912	6.81876	4.41384	2.55606e-05	0.000111555	1.42333
C7orf23	0.768396	4.47518	4.41217	2.57264e-05	0.000112157	1.5508
C2orf34	0.833132	3.24722	4.4119	2.57528e-05	0.000112242	1.76467
GPR84	1.87414	-0.303848	4.40966	2.59778e-05	0.000113101	2.17777
ELAVL1	0.462906	6.62118	4.4094	2.60039e-05	0.000113153	1.40702
UBE2T	1.0445	4.5309	4.40675	2.62714e-05	0.000114225	1.52273
PTTG1	1.18567	5.26803	4.40566	2.63818e-05	0.000114596	1.43905
CHD6	0.855423	5.80882	4.40557	2.63918e-05	0.000114596	1.4076
MND1	1.21618	2.6173	4.40555	2.63934e-05	0.000114596	1.85037
LRRC14	0.813333	5.20952	4.40549	2.63994e-05	0.000114596	1.44302
KIAA0664P3	1.10045	1.58082	4.40541	2.64077e-05	0.000114601	1.99205
ZNF841	0.9294	3.23344	4.40499	2.64501e-05	0.000114728	1.7416
CUL7	0.755016	5.45331	4.40446	2.65045e-05	0.000114929	1.4215
POLR3C	0.536147	4.87516	4.40375	2.65771e-05	0.000115213	1.46875
PTRH1	1.06417	3.24579	4.39737	2.72411e-05	0.000117838	1.71109
ADAMTS12	2.63939	2.2319	4.39612	2.73723e-05	0.000118342	1.87364
AGRN	1.05676	7.47953	4.38525	2.85447e-05	0.000122983	1.32273
UBAC2	0.766754	6.952	4.38468	2.86072e-05	0.000123219	1.31536
ATAD3B	1.26203	4.66113	4.3841	2.86718e-05	0.000123465	1.42147
TSN	0.459305	7.03785	4.38042	2.90806e-05	0.000125091	1.3
PLEK2	0.882274	5.76596	4.37993	2.91352e-05	0.000125226	1.31417
AGPAT6	0.723721	6.52003	4.37929	2.9208e-05	0.000125472	1.29575
TPP2	0.715185	6.17953	4.37892	2.92487e-05	0.000125614	1.29845
RRN3P1	1.31181	2.06382	4.37733	2.9429e-05	0.000126254	1.8278
EPRS	0.600243	7.54147	4.377	2.94667e-05	0.000126382	1.29311
CDCA8	0.959015	5.37856	4.37553	2.96339e-05	0.000126998	1.31904
TOP1P1	0.700093	2.8491	4.37477	2.97199e-05	0.000127282	1.69845
DDX39	0.92114	6.46079	4.37452	2.97491e-05	0.000127356	1.27853
LOC100129637	0.902004	3.91225	4.37156	3.00898e-05	0.000128678	1.49205
ACTL6A	0.695736	6.43725	4.36972	3.0303e-05	0.00012949	1.26098
DNAH5	1.93448	-0.750987	4.36879	3.04118e-05	0.000129815	2.06237
PIBF1	0.868587	4.72678	4.36568	3.0778e-05	0.000131205	1.34505
SMARCAL1	0.401886	4.76894	4.36532	3.08202e-05	0.00013135	1.33872
GCLM	0.789381	4.10241	4.36163	3.12602e-05	0.000133155	1.42206
PORCN	0.791375	3.12595	4.36114	3.13193e-05	0.000133336	1.59941
CXCL2	1.97518	3.87043	4.35955	3.1511e-05	0.000134046	1.45529
C2orf27A	1.55005	-0.410449	4.35578	3.19714e-05	0.000135826	1.98981
MCM4	0.947073	6.72898	4.35395	3.21968e-05	0.00013664	1.20136
KIF11	0.864908	5.49922	4.34325	3.35443e-05	0.000142022	1.19226
TMEM184B	0.570455	6.42476	4.34234	3.36618e-05	0.000142482	1.16006
ZNF792	0.726079	3.01096	4.34029	3.39276e-05	0.000143532	1.54354
NMB	1.1181	2.28166	4.33908	3.40852e-05	0.000144086	1.65713
GET4	0.868029	5.99651	4.33781	3.42517e-05	0.000144676	1.15087
DIDO1	0.684214	6.91966	4.3369	3.43715e-05	0.000145106	1.13879
EIF6	0.975354	8.1992	4.33568	3.45315e-05	0.000145629	1.15305
NANOS3	2.54081	-0.957554	4.33527	3.45859e-05	0.000145821	1.95583
HSD17B7	0.875073	4.07759	4.33513	3.46043e-05	0.00014586	1.32878
APOC2	2.33649	2.15703	4.33202	3.50191e-05	0.000147416	1.64909
POLB	0.840628	4.06264	4.33161	3.5074e-05	0.000147609	1.31841
TRMT112	0.795538	6.72599	4.32918	3.5401e-05	0.00014883	1.11021
WDR85	0.803029	4.40601	4.32903	3.54219e-05	0.000148879	1.25366
PHF20L1	0.609613	5.65166	4.32714	3.56789e-05	0.000149881	1.1247
VARS2	0.666339	5.15552	4.32675	3.57317e-05	0.000150064	1.15688
ZNF766	0.572327	4.1933	4.32197	3.63912e-05	0.000152635	1.26093
MORC4	0.996639	4.96124	4.3216	3.64419e-05	0.000152808	1.15649
RBMX2	0.742393	4.75089	4.3208	3.65531e-05	0.000153235	1.17707
KIAA0415	0.810441	5.50078	4.32034	3.66174e-05	0.000153464	1.10797
RNF113A	0.764679	4.51331	4.32019	3.66396e-05	0.000153518	1.20581
BID	0.755699	5.63453	4.31978	3.66968e-05	0.000153717	1.09854
RPP25	1.13954	5.00121	4.31913	3.67884e-05	0.000154061	1.1433
ZNF782	0.87508	1.83205	4.31881	3.68334e-05	0.000154209	1.64444
HSF1	0.715226	6.81869	4.31646	3.71641e-05	0.000155433	1.06357
VAC14	0.565513	5.92852	4.31593	3.72393e-05	0.000155667	1.0725
HIATL2	1.11672	0.425097	4.31552	3.72977e-05	0.00015583	1.77617
ERF	0.662034	5.91149	4.31336	3.7607e-05	0.000156943	1.06358
C20orf134	1.36982	2.4835	4.31332	3.76128e-05	0.000156943	1.533
SKP2	0.856001	3.85539	4.31204	3.77977e-05	0.000157674	1.28366
NXPH4	2.86507	-0.325137	4.31081	3.7975e-05	0.000158332	1.8207
C7orf44	0.657518	4.97783	4.31051	3.80188e-05	0.000158474	1.11413
IGFL4	2.20634	-3.1572	4.31014	3.80724e-05	0.000158656	1.98631
GTPBP10	0.617999	4.50508	4.30784	3.84068e-05	0.000160009	1.1618
PLS3	0.880805	6.97913	4.3054	3.87668e-05	0.000161467	1.02349
KIAA1731	0.694164	4.06818	4.30378	3.90059e-05	0.000162379	1.2156
UTP15	0.677219	3.90319	4.3024	3.92126e-05	0.000163113	1.23979
AASDHPPT	0.569299	5.27711	4.3023	3.92265e-05	0.000163129	1.05728
SFRS11	0.52176	6.8968	4.29995	3.95804e-05	0.000164474	1.0032
ZNF621	0.700667	4.80352	4.29849	3.98006e-05	0.000165346	1.08922
CAMKV	3.31271	-0.967927	4.29634	4.01285e-05	0.000166537	1.81669
NUP188	0.713023	6.36359	4.29611	4.01627e-05	0.000166636	0.991104
LDLRAD3	1.64498	3.3593	4.29497	4.03379e-05	0.00016732	1.31412
KCNJ11	1.24632	1.81337	4.29377	4.05229e-05	0.000168001	1.55593
SRRM5	1.01765	-0.0442099	4.29282	4.06693e-05	0.000168565	1.73339
MAD2L1	1.04654	5.43598	4.29259	4.07052e-05	0.00016867	1.01041
B3GALT6	0.780399	4.48292	4.29124	4.0915e-05	0.000169496	1.10431
ARHGEF1	0.685334	6.72285	4.28954	4.1179e-05	0.000170546	0.965049
OBFC2B	0.639971	5.75069	4.28895	4.12726e-05	0.00017089	0.980283
KRT6A	3.95821	-1.20908	4.28834	4.13684e-05	0.000171199	1.80464
LOC150197	2.02331	-1.37282	4.28805	4.14145e-05	0.000171346	1.81437
INPP5E	0.760232	3.80034	4.28611	4.17196e-05	0.00017252	1.19931
ALDH3B2	2.56543	-0.439418	4.28167	4.24309e-05	0.000175281	1.72497
TIGD3	1.21672	-0.307569	4.2816	4.2442e-05	0.000175282	1.71436
PAH	3.78094	-0.36983	4.28116	4.25125e-05	0.000175528	1.71771
C10orf35	0.951932	2.61407	4.28017	4.26735e-05	0.00017603	1.3919
TMEM5	0.531995	4.18401	4.27898	4.28664e-05	0.000176719	1.10551
BUB3	0.549764	6.95219	4.27663	4.325e-05	0.000178164	0.91832
RALGAPB	0.639239	6.79644	4.2752	4.34857e-05	0.000178998	0.912753
RNF216L	0.588767	3.88919	4.27497	4.35246e-05	0.000179112	1.14238
HNRNPA1L2	0.67665	7.29912	4.27394	4.36938e-05	0.000179671	0.911364
PPEF1	1.80333	-2.13463	4.2705	4.42676e-05	0.000181799	1.79736
CORO7	0.697758	5.79169	4.26355	4.54496e-05	0.000186416	0.886164
FOXA2	0.94159	5.54876	4.26311	4.5526e-05	0.000186682	0.896109
APEX2	0.667651	5.60488	4.26029	4.6015e-05	0.000188558	0.882888
ARHGAP8	0.823399	4.61658	4.25635	4.67077e-05	0.000191111	0.959056
CNNM3	0.484902	5.90951	4.25625	4.67245e-05	0.000191111	0.85533
NOX4	2.35845	0.460752	4.25567	4.68275e-05	0.000191448	1.55772
GCFC1	0.625651	5.04256	4.25503	4.69413e-05	0.000191755	0.905343
ZNF26	0.668843	3.29641	4.25397	4.71298e-05	0.000192428	1.17711
FKBP9	0.632033	7.59126	4.25202	4.74779e-05	0.000193751	0.835888
TBX6	1.20328	0.219425	4.25186	4.7507e-05	0.000193821	1.56462
CLDN14	2.21047	-0.810605	4.24734	4.83259e-05	0.000197062	1.63054
LRRC43	1.56018	-1.33484	4.24498	4.87603e-05	0.000198733	1.6587
KRT16	3.07957	-1.81802	4.24088	4.95212e-05	0.00020158	1.67451
LPAR2	0.755062	4.26591	4.24033	4.96236e-05	0.000201895	0.952086
RAB36	1.22582	3.34811	4.23883	4.99056e-05	0.00020294	1.11273
ERGIC3	0.762182	8.57389	4.23739	5.01787e-05	0.000203999	0.802198
LUC7L	0.890883	4.89116	4.23591	5.04592e-05	0.000205037	0.85169
RNF187	0.650765	6.8617	4.23525	5.05854e-05	0.000205498	0.767768
LOC388152	1.01972	3.82027	4.23507	5.06186e-05	0.000205581	1.01055
C7orf26	0.530872	5.03598	4.23413	5.07985e-05	0.000206259	0.830306
C14orf79	0.873921	2.88966	4.23383	5.08563e-05	0.000206442	1.17821
BIRC5	1.23939	4.74297	4.23258	5.10969e-05	0.000207263	0.856851
ADAMTSL5	1.31092	2.22254	4.23146	5.13136e-05	0.000208037	1.27578
MED14	0.746911	6.71087	4.23033	5.1532e-05	0.00020887	0.74994
C15orf23	0.876164	4.22168	4.2289	5.18116e-05	0.000209793	0.917808
ZNF703	0.988346	5.82906	4.22766	5.2054e-05	0.000210722	0.754629
CORIN	2.65038	0.104361	4.22666	5.22505e-05	0.000211411	1.48439
C20orf72	0.94603	4.92269	4.22575	5.24309e-05	0.000212034	0.811633
FANCG	0.753323	4.34873	4.22525	5.25293e-05	0.000212353	0.88461
BCS1L	0.646987	4.64598	4.22522	5.2536e-05	0.000212353	0.842545
UHRF1BP1	0.717776	4.7477	4.22475	5.26274e-05	0.00021267	0.828012
SLC41A3	0.60192	5.75612	4.22257	5.30619e-05	0.000214211	0.739095
PRR14	0.547654	5.33116	4.2213	5.33166e-05	0.000215185	0.758886
TJAP1	0.609618	4.86023	4.21925	5.37293e-05	0.000216688	0.794971
SETD1A	0.537165	5.56921	4.21692	5.42031e-05	0.00021849	0.727754
JRK	0.895628	4.51663	4.21554	5.44851e-05	0.000219463	0.825048
MAP7	0.625864	6.91291	4.20917	5.58061e-05	0.000224445	0.673748
IBSP	3.36675	-1.59873	4.20911	5.58193e-05	0.000224445	1.54907
EML4	0.509198	7.0845	4.20843	5.59628e-05	0.00022491	0.671962
GPR143	2.62391	2.22276	4.20819	5.60129e-05	0.000225055	1.19236
PGC	2.76487	-1.36921	4.207	5.62637e-05	0.00022595	1.52679
PMS2CL	0.674351	2.22354	4.20681	5.63049e-05	0.000226059	1.1873
TIA1	0.621616	6.01271	4.20644	5.63838e-05	0.00022632	0.672199
FLAD1	0.634394	5.53692	4.20442	5.68124e-05	0.000227922	0.684514
TNFSF15	1.48591	1.189	4.20428	5.68431e-05	0.000227937	1.30662
ATXN2	0.514247	5.29315	4.20337	5.70369e-05	0.000228657	0.697148
BAT2L2	0.764246	7.72985	4.2033	5.70524e-05	0.000228663	0.662202
HNRNPA1	0.625154	8.76511	4.20319	5.70765e-05	0.000228703	0.682721
USP10	0.509752	6.64564	4.20038	5.76813e-05	0.000231069	0.642075
WT1	3.48163	-0.59808	4.20031	5.76971e-05	0.000231074	1.44781
FEN1	0.846864	5.75324	4.19942	5.78888e-05	0.00023167	0.655791
EPHB2	1.06643	7.87022	4.19917	5.7945e-05	0.00023178	0.649944
HECW2	1.34824	1.92517	4.19785	5.82323e-05	0.000232872	1.19656
KIAA1804	0.747242	4.82764	4.19586	5.86675e-05	0.00023438	0.714567
UBA6	0.542838	5.62494	4.19549	5.87493e-05	0.000234648	0.647719
ATRIP	0.772756	3.52514	4.19489	5.88812e-05	0.000235117	0.921294
ERBB3	0.703593	8.48812	4.19321	5.92556e-05	0.000236437	0.641101
HSPA1B	1.18199	7.12478	4.19287	5.93307e-05	0.000236678	0.616307
ISM2	3.49474	0.166616	4.18936	6.01157e-05	0.000239504	1.34675
KCP	1.45915	-0.23079	4.18859	6.02892e-05	0.000240027	1.37722
UGGT1	0.637383	6.9201	4.18786	6.04559e-05	0.000240519	0.597107
TDRKH	0.751085	3.72328	4.18785	6.04575e-05	0.000240519	0.858757
UTP23	0.688775	4.82317	4.18776	6.04786e-05	0.000240544	0.685988
SNRPE	0.828678	5.76183	4.18701	6.06486e-05	0.000241161	0.610835
HPS4	0.648095	5.35412	4.18674	6.07107e-05	0.000241301	0.632764
RAB22A	0.679085	6.49576	4.18594	6.0891e-05	0.000241767	0.590929
CA5BP	0.728756	3.455	4.18472	6.11707e-05	0.000242759	0.898188
CHCHD6	0.897619	3.37418	4.18365	6.14169e-05	0.000243676	0.909598
KIAA1543	0.750441	5.8769	4.18358	6.14334e-05	0.000243681	0.594107
GCC1	0.592861	5.36521	4.18154	6.19049e-05	0.000245431	0.613288
IWS1	0.440468	5.9884	4.18089	6.2056e-05	0.000245909	0.581074
PSMG1	1.04845	5.63951	4.17911	6.2469e-05	0.000247407	0.588195
AFG3L1	0.87669	3.61389	4.17907	6.24798e-05	0.000247407	0.847928
CG030	1.24313	1.1358	4.17724	6.29089e-05	0.000249045	1.21601
GALK1	0.854001	4.3726	4.17701	6.29635e-05	0.0002492	0.707552
MTHFSD	0.574006	4.00504	4.17693	6.29806e-05	0.000249206	0.768078
MRM1	0.96078	3.541	4.17645	6.30938e-05	0.000249532	0.852306
REPIN1	0.613247	7.73314	4.17286	6.39481e-05	0.000252539	0.55298
BRPF1	0.50267	4.95198	4.17243	6.4052e-05	0.000252826	0.616907
MCM3APAS	1.06687	0.654799	4.16723	6.5308e-05	0.000257092	1.22618
C4orf48	1.63455	1.85099	4.16711	6.53364e-05	0.000257142	1.09702
DDX19A	0.50688	5.57146	4.16487	6.58871e-05	0.00025912	0.54069
PSMG4	0.888183	3.80563	4.1647	6.5928e-05	0.000259217	0.76069
CEP78	0.700922	3.89393	4.16413	6.60682e-05	0.000259695	0.742343
NARS2	0.671172	4.86239	4.16401	6.60993e-05	0.000259701	0.596378
DENR	0.518181	6.45487	4.16275	6.64104e-05	0.000260796	0.508144
IMP4	0.614598	5.66483	4.16226	6.65315e-05	0.000261208	0.526609
USP6NL	0.678133	5.40018	4.16114	6.68108e-05	0.000262177	0.537866
FPGS	0.80768	5.83186	4.16044	6.69863e-05	0.000262802	0.512952
OAS3	1.16357	6.50365	4.15938	6.72518e-05	0.00026378	0.495738
HYAL2	0.590938	6.07981	4.15909	6.73242e-05	0.000264	0.500676
LPO	2.99284	-2.32877	4.15755	6.77117e-05	0.000265455	1.41166
DLEU2	1.36803	1.71273	4.15697	6.78579e-05	0.000265899	1.07876
FAM119B	0.644531	3.16634	4.15682	6.78958e-05	0.000265983	0.852796
SLC17A9	1.77745	5.07309	4.15602	6.81008e-05	0.000266721	0.546129
HSD17B7P2	1.04899	1.25734	4.15581	6.81543e-05	0.000266866	1.12742
ZNRD1	0.79723	4.96159	4.15567	6.81896e-05	0.000266875	0.556022
KRT6C	2.90953	-2.38828	4.15515	6.83222e-05	0.000267329	1.40653
UQCC	0.773451	5.95631	4.15377	6.8675e-05	0.000268508	0.484968
C7orf13	1.12511	2.86508	4.15364	6.87067e-05	0.000268508	0.895707
F7	2.58755	-0.168853	4.15325	6.8806e-05	0.000268831	1.24765
CCDC142	0.711043	2.91418	4.15225	6.90636e-05	0.000269642	0.882152
TFCP2	0.437378	5.25255	4.1516	6.92329e-05	0.000270172	0.514761
LFNG	0.989239	6.79924	4.14945	6.97886e-05	0.000272078	0.459449
CEBPZ	0.502766	6.3253	4.1485	7.00371e-05	0.000272851	0.458603
TXLNG	1.04628	3.97263	4.1485	7.00376e-05	0.000272851	0.672435
CDK12	0.848405	6.42209	4.14823	7.01067e-05	0.000273054	0.456563
HIST1H1E	1.83329	-2.07141	4.14777	7.02272e-05	0.000273458	1.36321
U2AF2	0.497329	7.63448	4.14742	7.03193e-05	0.00027375	0.460348
?|10357	0.936503	3.56148	4.14409	7.11953e-05	0.000277027	0.733139
AGAP8	1.51585	0.515639	4.14195	7.17671e-05	0.000279185	1.14937
ZNF326	0.524451	4.99088	4.14154	7.18772e-05	0.000279478	0.502625
POLR3K	0.729634	4.62831	4.13911	7.25301e-05	0.000281949	0.536282
LAPTM4B	1.24734	7.34279	4.13877	7.2622e-05	0.000282213	0.425109
PPME1	0.563588	5.9143	4.13771	7.29082e-05	0.000283214	0.42898
AAAS	0.529275	5.40039	4.13721	7.30427e-05	0.000283532	0.452529
RPLP0P2	1.42787	0.974773	4.13605	7.33583e-05	0.000284689	1.08662
SFRS8	0.540296	5.37521	4.13249	7.4337e-05	0.000288071	0.437447
TNRC18	0.708536	7.87385	4.1321	7.44446e-05	0.000288344	0.41016
ABCF2	0.547453	6.38193	4.13076	7.48171e-05	0.000289515	0.394724
GPR3	1.44746	0.185052	4.12958	7.51448e-05	0.000290519	1.13469
ASCC3	0.712422	5.88647	4.12956	7.51499e-05	0.000290519	0.400889
LRFN4	0.908704	5.1681	4.12945	7.51811e-05	0.000290519	0.442985
ARL8A	0.515958	5.59002	4.1276	7.57005e-05	0.000292163	0.406871
C18orf45	0.662931	2.79052	4.12709	7.58448e-05	0.00029265	0.814461
SLC29A1	0.858917	6.60363	4.12693	7.58883e-05	0.000292748	0.379585
C19orf71	1.08558	-1.49552	4.12463	7.65393e-05	0.000295189	1.24711
RRM2	1.03357	6.61422	4.12431	7.66305e-05	0.00029547	0.370241
TMEM150A	0.630546	3.99153	4.12284	7.70506e-05	0.000296806	0.577897
HMGB1	0.746902	9.04008	4.12176	7.73589e-05	0.000297923	0.397348
ATP6V1E2	1.08162	1.31277	4.12135	7.74783e-05	0.000298312	0.999999
KIF4B	1.16893	-0.65355	4.12119	7.75247e-05	0.000298419	1.17449
CDK13	0.490478	5.84999	4.12101	7.75757e-05	0.000298473	0.371839
ORC3L	0.636115	4.77964	4.11888	7.8192e-05	0.000300773	0.445414
GAR1	0.719982	4.85264	4.11723	7.86722e-05	0.000302476	0.431
PPM1J	1.36817	0.535062	4.11704	7.87261e-05	0.000302611	1.06029
GRAMD2	1.87064	2.19086	4.11681	7.87937e-05	0.000302799	0.872587
ALG11	1.11823	0.149769	4.11062	8.06236e-05	0.00030961	1.07139
AGTRAP	0.782759	4.93285	4.10986	8.08498e-05	0.000310331	0.396167
TRPV4	1.66837	0.429839	4.10918	8.10532e-05	0.000311038	1.04209
THOC6	0.76967	5.00536	4.10872	8.11915e-05	0.000311347	0.384638
RNF8	0.538099	4.57633	4.10834	8.1307e-05	0.000311715	0.434007
EIF3CL	0.777859	9.43045	4.10565	8.21213e-05	0.000314688	0.348214
TRIT1	0.685688	4.52274	4.10511	8.22852e-05	0.000315241	0.429937
E2F5	1.18296	3.92857	4.10434	8.25197e-05	0.000316065	0.523791
DNAH17	1.04139	0.232766	4.10423	8.25525e-05	0.000316115	1.04196
HEPHL1	3.32421	-1.51123	4.10354	8.27651e-05	0.000316725	1.17507
CDC20	1.07378	5.90519	4.10352	8.27705e-05	0.000316725	0.30793
BEND3	0.68448	3.73591	4.10024	8.37829e-05	0.000320211	0.544933
PNPO	0.721782	5.5979	4.09979	8.39232e-05	0.000320604	0.307872
FRS3	0.662578	2.51493	4.09896	8.41782e-05	0.000321502	0.760894
EEPD1	1.0413	5.12207	4.09788	8.45167e-05	0.000322529	0.335208
MRTO4	0.836352	5.9013	4.09785	8.4527e-05	0.000322529	0.287975
ATP6V1F	0.821737	6.58514	4.09635	8.4995e-05	0.000324238	0.271284
GSTP1	0.930142	8.84857	4.09282	8.61113e-05	0.000328341	0.290968
SH3GL1	0.57516	6.6272	4.09263	8.61731e-05	0.000328499	0.257985
TMEM147	0.69131	6.2641	4.09195	8.63901e-05	0.000329249	0.258721
PARP14	0.797332	6.33093	4.08988	8.70541e-05	0.000331545	0.250517
ZNF789	0.93555	2.55935	4.08825	8.75776e-05	0.000333381	0.71616
LPIN3	1.01825	5.18908	4.08759	8.77931e-05	0.000334044	0.292906
SH2D5	2.19387	-1.91889	4.08333	8.91844e-05	0.000339098	1.13139
PPP1R9B	0.566863	6.09645	4.08045	9.01357e-05	0.000342232	0.221257
DNASE1L2	1.6084	-1.20644	4.07952	9.04465e-05	0.000343331	1.07115
THOC3	0.817551	5.86545	4.0782	9.08879e-05	0.000344925	0.219874
ANKMY1	0.624663	3.5319	4.07809	9.09263e-05	0.00034499	0.505487
MIIP	0.837618	4.50385	4.07771	9.10511e-05	0.000345382	0.335992
CNPY3	0.828428	6.30841	4.07497	9.19767e-05	0.000348648	0.198249
MAD2L2	0.917065	4.25873	4.07478	9.2042e-05	0.000348814	0.362716
TYSND1	0.710793	5.02033	4.0746	9.21022e-05	0.000348878	0.262655
VCP	0.485608	8.6663	4.07363	9.2432e-05	0.000349963	0.219532
MIPEP	0.866593	5.49087	4.07324	9.25636e-05	0.000350363	0.220391
COASY	0.562262	6.53693	4.07319	9.2581e-05	0.000350363	0.189831
TFB1M	0.742577	3.943	4.07255	9.28011e-05	0.000351031	0.40919
ZNF354B	0.846298	2.20669	4.07175	9.30743e-05	0.000351982	0.712203
REPS1	0.520193	5.44843	4.0693	9.39197e-05	0.000355096	0.209151
LPGAT1	0.699161	6.57429	4.06872	9.41189e-05	0.000355749	0.173887
PPFIA3	0.913682	4.29314	4.06703	9.47071e-05	0.000357487	0.330047
TNNI3	3.15134	-1.35572	4.06366	9.58867e-05	0.000361517	1.02701
RAD23A	0.566711	7.38959	4.06304	9.61062e-05	0.00036226	0.157857
AGAP4	0.99259	3.13473	4.06174	9.65676e-05	0.00036383	0.523143
WDHD1	0.820054	3.77748	4.06113	9.67834e-05	0.000364557	0.399662
PSME4	0.574097	6.36946	4.05761	9.80452e-05	0.000368794	0.136431
DKK4	3.60968	-1.66517	4.0571	9.82309e-05	0.000369407	1.02527
ZWILCH	0.756937	4.69757	4.05634	9.8503e-05	0.000370257	0.234846
DPP9	0.502779	6.49795	4.05575	9.87183e-05	0.000370893	0.128794
ORMDL1	0.531218	5.01823	4.05569	9.8741e-05	0.000370893	0.196418
FZR1	0.531582	5.76862	4.05166	0.000100213	0.000375984	0.130327
MEX3D	0.720082	4.55374	4.04948	0.000101016	0.000378646	0.229847
SFRS1	0.429258	8.10421	4.04841	0.000101415	0.000379967	0.119282
[truncated: 14,150 more rows]
